# Supplementary material for: The IDEAL DVT study, individualised duration elastic compression therapy against long-term duration of therapy for the prevention of post-thrombotic syndrome: protocol of a randomised controlled trial
Source: PubMed Central journal article supplement — BMJ Open. 2014 Sep 4;4(9):e005265. doi: 10.1136/bmjopen-2014-005265 (PMC4158195; doi:10.1136/bmjopen-2014-005265), 2014-09-04
Supplement: bmjopen-2014-005265.draft_revisions.pdf [file bmjopen-2014-005265.draft_revisions.pdf]

# BMJ Open

## The IDEAL DVT study, individualized duration elastic compression therapy against long-term duration of therapy for the prevention of post thrombotic syndrome, a randomized controlled trial

|                                 |                                                                                                                                                                                                                                                                                                                                                                                                                                                                                                                                                                                                                                                                                                                                                                                                                    |
|---------------------------------|--------------------------------------------------------------------------------------------------------------------------------------------------------------------------------------------------------------------------------------------------------------------------------------------------------------------------------------------------------------------------------------------------------------------------------------------------------------------------------------------------------------------------------------------------------------------------------------------------------------------------------------------------------------------------------------------------------------------------------------------------------------------------------------------------------------------|
| Journal:                        | <i>BMJ Open</i>                                                                                                                                                                                                                                                                                                                                                                                                                                                                                                                                                                                                                                                                                                                                                                                                    |
| Manuscript ID:                  | bmjopen-2014-005265                                                                                                                                                                                                                                                                                                                                                                                                                                                                                                                                                                                                                                                                                                                                                                                                |
| Article Type:                   | Protocol                                                                                                                                                                                                                                                                                                                                                                                                                                                                                                                                                                                                                                                                                                                                                                                                           |
| Date Submitted by the Author:   | 14-Mar-2014                                                                                                                                                                                                                                                                                                                                                                                                                                                                                                                                                                                                                                                                                                                                                                                                        |
| Complete List of Authors:       | ten Cate, Arina; Maastricht University Medical Centre, Laboratory for Thrombosis and Hemostasis; Maastricht University Medical Center, Internal Medicine<br>Bouman, Annemieke; Maastricht University Medical Centre, Laboratory for Thrombosis and Hemostasis; Maastricht University Medical Center, Internal Medicine<br>Joore, Manuela; Maastricht University Medical Centre, Department of Clinical Epidemiology and Medical Technology Assessment (KEMTA)<br>Prins, Martin; Maastricht University Medical Center, Epidemiology; Maastricht University Medical Centre, Department of Clinical Epidemiology and Medical Technology Assessment (KEMTA)<br>ten Cate, Hugo; Maastricht University Medical Center, Internal Medicine; Maastricht University Medical Centre, Laboratory for Thrombosis and Hemostasis |
| <b>Primary Subject Heading</b>: | Cardiovascular medicine                                                                                                                                                                                                                                                                                                                                                                                                                                                                                                                                                                                                                                                                                                                                                                                            |
| Secondary Subject Heading:      | Haematology (incl blood transfusion), Health economics                                                                                                                                                                                                                                                                                                                                                                                                                                                                                                                                                                                                                                                                                                                                                             |
| Keywords:                       | Post thrombotic syndrome, Deep vein thrombosis, Elastic compression stocking therapy, Protocol, RCT                                                                                                                                                                                                                                                                                                                                                                                                                                                                                                                                                                                                                                                                                                                |
|                                 |                                                                                                                                                                                                                                                                                                                                                                                                                                                                                                                                                                                                                                                                                                                                                                                                                    |

SCHOLARONE™  
Manuscripts

1  
2  
3 Study Protocol

4 The IDEAL DVT study, individualized duration elastic compression therapy against long-term duration  
5 of therapy for the prevention of post thrombotic syndrome, a randomized controlled trial  
6  
7  
8  
9

10  
11  
12  
13  
14  
15 Authors: Arina J ten Cate-Hoek<sup>1,2</sup>, Annemieke C Bouman<sup>1,2</sup>, Manuela Joore<sup>3</sup>, Martin Prins<sup>3,4</sup>, Hugo  
16 ten Cate<sup>1,2</sup>, for the IDEAL DVT trial investigators.  
17  
18  
19

20  
21 Corresponding author: Arina J ten Cate-Hoek MD, PhD.  
22

23 Address: P Debyelaan 25  
24

25 6229 HX Maastricht  
26

27 E-mail: [arina.tencate@maastrichtuniversity.nl](mailto:arina.tencate@maastrichtuniversity.nl)  
28

29 Telephone number: 0031(0)43-3871243  
30

31 Fax number: 0031(0)43-3876096  
32  
33

34 <sup>1</sup>Laboratory for Thrombosis and Hemostasis, Maastricht University Medical Centre, Maastricht, the  
35 Netherlands  
36

37 <sup>2</sup>Department of Internal Medicine, Maastricht University Medical Centre, Maastricht, the Netherlands  
38

39 <sup>3</sup>Department of Clinical Epidemiology and Medical Technology Assessment (KEMTA), Maastricht  
40 University Medical Center, Maastricht, The Netherlands  
41

42 <sup>4</sup>Department of Epidemiology, Care and Public Health Research Institutes, Maastricht University,  
43 Maastricht, the Netherlands  
44  
45  
46  
47  
48

49 Key words: Post thrombotic syndrome, deep vein thrombosis, elastic compression stocking therapy,  
50 protocol, RCT  
51

52 Word count: 3345  
53  
54  
55  
56  
57  
58  
59  
60

**Abstract****Introduction:**

Post thrombotic syndrome (PTS) is a serious complication of deep vein thrombosis (DVT) of the leg that affects 20-50% of patients. Once a patient experiences PTS there is no treatment that effectively reduces the debilitating complaints. Two randomized controlled trials showed that elastic compression stocking (ECS) therapy after DVT for 24 months can reduce the incidence of PTS by 50%. However, it is unclear whether all patients benefit to the same extent from ECS therapy or what the optimal duration of therapy for individual patients should be. ECS therapy is costly, inconvenient, demanding and sometimes even debilitating. Tailoring therapy to individual needs could save substantial costs. The objective of the IDEAL DVT study therefore is to evaluate whether tailoring the duration of ECS therapy on signs and symptoms of the individual patient is a safe and effective method to prevent PTS, compared to standard ECS therapy.

**Methods and analysis:**

A multicentre, single-blinded, allocation concealed, randomized, non-inferiority trial. A total of 864 consecutive patients with acute objectively documented proximal DVT of the leg are randomized to either standard duration of 24 months or tailored duration of ECS therapy following an initial therapeutic period of 6 months. Signs and symptoms of PTS are recorded at regular clinic visits. Furthermore, quality of life, costs, patient preferences and compliance are measured. The primary outcome is the proportion of patients with PTS after 24 months.

**Ethics and dissemination:**

Based on current knowledge the broad application of ECS therapy is questioned. The IDEAL DVT study will address the central questions that remain unanswered: What individual patients do benefit from ECS therapy and what is the optimal individual treatment duration? Primary ethics approval was received from the Maastricht University Medical Centre.

Results of the study will be disseminated via peer-reviewed publications and presentations at scientific conferences.

**Trial Registration:**

NCT01429714 and NTR 2597

## Background

After deep vein thrombosis (DVT) 20-50% of patients develop post thrombotic syndrome (PTS). PTS is a chronic condition, characterized by leg complaints such as pain; heaviness; cramps; aching; tingling; and leg signs due to venous insufficiency, evolving in severe cases to venous ulceration of the leg that was affected by the DVT.<sup>1-4</sup> PTS is a serious affliction, with substantial impact on quality of life and costs.<sup>15</sup> Because an effective therapy is lacking, prevention of PTS is of major importance. Up till now, elastic compression stocking (ECS) therapy after DVT is the mainstay of PTS prevention. The evidence sustaining the value of ECS therapy following acute DVT is derived from 2 randomized clinical trials.<sup>67</sup> Incidences of PTS were reduced significantly (approximately 50%) by application of ECS therapy for 24 months in all patients in these studies. However, based on these trials it is still undecided whether all patients benefit to the same extent from ECS therapy or what the optimal duration of ECS therapy for individual patients should be. There have been other studies that highlighted different aspects of ECS therapy. A significant benefit of early ambulation and early compression measured as mean score on Villalta (a score containing 5 leg symptoms and 6 objective signs), was found in a follow-up study of a small trial that compared ambulation combined with inelastic compression (Unna boot) or ECS therapy to bed rest without any compression in the acute phase of 9 days, followed by ECS therapy for all patients during 2 years of follow up.<sup>89</sup> ECS therapy may not be indicated for all patients as shown by a study that assessed whether ECS therapy initiated one year after the event of DVT would lower the incidence of PTS in patients without complaints but with reflux on duplex testing. No significant benefit of ECS therapy at this late time of onset was found. The incidence of PTS was low in both groups.<sup>10</sup> Only one study so far assessed whether prolonged duration of ECS therapy was superior to 6 months of ECS therapy following an event of proximal DVT. In this study no significant difference in the incidence of PTS according to the CEAP classification was observed between the two treatment groups.<sup>11</sup> The safety of shortened duration of ECS therapy based on individual patient clinical scores was assessed in our management study, and we showed that tailoring the duration of ECS therapy based on the signs and symptoms of the individual patient after an initial treatment period of 6 months, is a safe strategy to prevent PTS.<sup>12</sup> We found that 50% of our patients did not need ECS therapy for as long as 2 years, while the overall incidence of PTS was 21.1% (95% CI 13.5- 28.7). This is comparable to published incidences after 24 months ECS therapy.<sup>6</sup>

<sup>7</sup> In the Netherlands, each year around 25.000 patients experience a new event of DVT. In order to

1  
2 prevent PTS, common practice is to prescribe custom fitted ECS therapy for 2 years for all patients.<sup>13</sup>

3  
4  
5  
6  
7  
8  
9  
10  
11  
12  
13  
14  
15  
16  
17  
18  
19  
20  
21  
22  
23  
24  
25  
26  
27  
28  
29  
30  
31  
32  
33  
34  
35  
36  
37  
38  
39  
40  
41  
42  
43  
44  
45  
46  
47  
48  
49  
50  
51  
52  
53  
54  
55  
56  
57  
58  
59  
60

14 ECS therapy is costly, demanding and sometimes even debilitating. Elderly patients can often not apply the ECS by themselves but need help from family or they even need home care visits (7.5%).<sup>15-</sup>

17 Total annual costs of ECS therapy roughly amounts to 2.5 million for stockings (25.000 patients\*100 euro) and 21 million for home care (7.5%\*25.000 patients\*500 visits\*20 euro).<sup>15-17</sup> Moreover, the majority of patients do not experience any post thrombotic complaints.<sup>10</sup> In the Netherlands, over 10 million euro each year could be saved if ECS treatment would be individualized. The results of a recently published trial performed by Kahn et al. refuted the routine wearing of ECS after DVT altogether. This study showed no treatment effect at all from ECS therapy in contrast to the large treatment effects found in previous non-placebo controlled trials.<sup>6 7</sup> The unexpected lack of effectiveness cannot be dismissed solely as a placebo effect. The compliance to ECS therapy, a major determinant of effectiveness, was 55.6% after 24 months, less than in the previous trials by Brandjes and Prandoni et al, where compliance was considerably higher, up to 90%.<sup>6 7 18</sup> Because compliance to therapy is one of the most important features for successful ECS therapy, we will perform a discrete choice experiment in which patient preferences towards ECS therapy will be assessed and the main obstacles for compliance to therapy will be addressed.

Based on current knowledge it is understood that the broad application of ECS therapy is questioned. Especially the benefit to individual patients and the optimal duration of ECS therapy were never studied properly and as a result it is unclear which individual patients require therapy and for how long.

The IDEAL DVT study aims to address these topics. In addition quality of life, patient preference towards ECS therapy, compliance tot therapy, as well as cost-effectiveness of ECS therapy will be assessed. The primary outcome is the proportion of patients with PTS at the end of follow-up.

## Methods/Design

A multicentre, single-blinded, allocation concealed, randomized, non-inferiority trial comparing individually tailored duration of ECS therapy (intervention) with standard duration of 24 months ECS therapy (control), for the prevention of PTS. Randomization will guarantee a fair distribution of patients within each patient group. Stratification will be performed on centre and potentially confounding effects such as age, sex and body mass index. The study will be a multi center study in order to get a good

1  
2  
3 representation of patients and to achieve sufficient patient numbers. The primary outcome will be PTS  
4 at 24 months after the event; the observers will be blinded to the allocated treatment arm. The  
5 allocation will be concealed from study personnel involved in assessing the leg symptoms and rating  
6 the PTS scores. Both randomization and allocation concealment are used as strategies against bias.  
7  
8 The study is not double blinded; no inactive stockings will be used in the comparator group. The use of  
9  
10 sham stockings will very likely interfere with the quality of life and will complicate the assessment of  
11  
12 perceived differences between groups. Patients will be followed for the entire study duration; incidence  
13  
14 of recurrent DVT and VTE related death during the follow-up period will be documented.  
15  
16  
17  
18  
19

#### 20 Patients and treatment

21  
22 Consecutive, consenting adults with an acute objectively documented proximal DVT of the leg,  
23 adequately treated with anticoagulant treatment are included in the study. Patients are included within  
24 6 weeks after DVT. Exclusion criteria are: previous DVT in the affected leg, recurrent DVT in the 6  
25 months following inclusion, pre-existent venous insufficiency (skin signs C3-C6 on CEAP score or  
26 requiring ECS therapy), contraindication for ECS therapy such as intermittent claudication or clinical  
27 signs of leg ischemia or asymptomatic arterial insufficiency (a pulse deficit or bruit at sites of narrowing  
28 at physical examination), active thrombolysis, and limited life expectancy (< 6 months).  
29  
30  
31  
32  
33  
34

35 Patients are recruited from 12 hospitals in the Netherlands and 2 hospitals in Italy. In the initial acute  
36 phase after DVT, until the acute oedema has disappeared, three strategies will be applied. The leg is  
37 either bandaged with short stretch bandages to a compression of 30-40 mmHg, worn day and night  
38 and redressed twice per week; or a bandage stocking with 35mmHg compression is prescribed  
39 (Mediven Struva 35<sup>®</sup>, Medi, Breda, the Netherlands), worn day and night; or no initial compression  
40 therapy is applied, according to the strategy of the hospital protocol. After the initial phase, a custom  
41 fitted, flat knitted, knee length graduated elastic compression stocking class III (ankle pressure 40  
42 mmHg) is prescribed for all patients. Patients are advised to wear the stockings during the daytime.  
43  
44  
45  
46  
47  
48  
49  
50

#### 51 Procedures

52  
53 After obtaining written informed consent, randomization is performed centrally at the coordinating  
54 study centre, the Maastricht University Medical centre. Patients are randomized to one of the two  
55  
56  
57  
58  
59  
60

1  
2  
3 treatment arms. (Figure 1) A web-based randomisation program (TENALEA (Trans European Network  
4 for Clinical Trials Services)) is used that executes blocked randomisation with stratification on centre-  
5 level and on possible confounding patient characteristics such as age, sex, and Body Mass Index.  
6  
7 Permutated blocks of randomly varying size are used to maintain balance of numbers in each treatment  
8  
9 group and to ensure allocation concealment.

10  
11 Information on allocation is only accessible to the study personnel at the coordinating study centre in  
12 Maastricht, and patients will receive information about their allocation via the coordinating study  
13 centre. The allocation will be concealed from study personnel involved in assessing the leg symptoms  
14 and rating the PTS scores. Patients are not blinded by the use of sham stockings, because they may  
15 influence quality of life, complicating the assessment of perceived differences between groups.  
16  
17 Patients are asked not to reveal their treatment allocation to their own physician, and not to wear the  
18 elastic compression stocking at the day of their outpatient clinic visits.  
19  
20  
21  
22  
23  
24

25  
26  
27 All patients are advised to wear the elastic compression stocking during the first 6 months after DVT.  
28  
29 In the control group, all patients are instructed to wear the elastic compression stocking daily for a total  
30 duration of 2 years. In the Intervention group, duration of ECS therapy is individually tailored based on  
31 Villalta scores.<sup>19</sup> After the first 6 months therefore, there are three scenarios:

- 32  
33  
34 (1) The Villalta score at both the 3 and 6-month follow-up visit is  $\leq 4$ . Then the patient is advised  
35 to discontinue ECS therapy.  
36  
37 (2) The Villalta score at the 3-month follow-up visit is  $\geq 5$  the Villalta score at the 6 month follow-  
38 up visit is  $\leq 4$ . The patient is advised to continue the ECS therapy for another 6 months. If the  
39 Villalta score at the 12 month follow-up visit is  $\leq 4$ , the patient is allowed to discontinue the  
40 ECS therapy,  
41  
42 (3) The Villalta score is  $\geq 5$  at both the 3 and 6 months follow-up visit. The patient is advised to  
43 continue the ECS therapy for a total duration of 24 months. (Figure 2)  
44  
45  
46  
47  
48  
49

50  
51 Once stopped, ECS treatment will not be reinstated. Using this algorithm the duration of ECS therapy  
52 is individually tailored in each patient. The decision on the duration of ECS therapy in patients in the  
53 intervention group is made centrally at the coordinating study centre, as only there the information on  
54  
55  
56  
57  
58  
59  
60

1  
2  
3 treatment allocation is available. The patient is informed about the decisions on the (dis) continuation  
4 of the ECS therapy by the coordinating centre.  
5  
6  
7

#### 8 Follow-up 9

10 All patients are followed for 24 months after DVT. During these 24 months they visit the outpatient  
11 clinic 4 times: at 3, 6, 12, and 24 months after the DVT. At each follow-up visit the signs of PTS will be  
12 recorded and scored, by the study nurse or the treating physician, using the objective part of the  
13 Villalta clinical scale for PTS.<sup>19</sup> In case of intermittent leg complaints or signs or symptoms suspect of  
14 recurrent VTE, patients are instructed to visit their treating physician. Study documentation will be  
15 filled out and adverse events will be recorded. The CCMO (central committee human related research)  
16 will be notified in case of serious adverse events or death.  
17  
18  
19  
20  
21  
22  
23

24 The patient is asked to fill out 5 questionnaires: at baseline, and 3, 6, 12 and 24 months later. All  
25 questionnaires will be offered as a web based application, each patient will have a unique personal  
26 entry code. For patients who are not able or willing to use the electronic questionnaires, a paper  
27 version will be available. The first questionnaire is filled out shortly after inclusion (4-6 weeks after  
28 DVT) and the subsequent questionnaires are filled out the day before each follow-up visit. All  
29 questionnaires contain the subjective part of the Villalta clinical scale for PTS<sup>19-23</sup>, questions on ECS  
30 compliance, a cost questionnaire, and three health related quality of life (HRQOL) questionnaires: the  
31 Dutch translated Veines-Qol<sup>23</sup>, the SF-36<sup>20</sup>, and the EuroQOL-5D<sup>21</sup>. In a subset of the study  
32 population patient preferences regarding elastic compression therapy will be analysed, by conducting  
33 a discrete choice experiment (DCE). For this purpose, a DCE questionnaire will be send to a subset of  
34 the population at approximately 3 months after DVT.  
35  
36  
37  
38  
39  
40  
41  
42  
43  
44

45 Compliance to ECS therapy is monitored in two ways. Each questionnaire contains a question on  
46 compliance to the advised version of ECS therapy. Because compliance and adherence to therapy is  
47 of crucial importance the number of contact moments for the assessment of compliance with ECS  
48 therapy will be increased by adding telephone contacts to the regular clinical visits. Study-supporting  
49 staff will make computer-assisted random telephone calls during the entire follow-up period to both the  
50 patients in the group with the 2-year ECS intervention and to patients in the group with individualized  
51 ECS therapy. The telephone calls will be made randomly to create a surprise effect (patients are off  
52  
53  
54  
55  
56  
57  
58  
59  
60



1  
2  
3 guard) and to allow for a distribution of contacts over the entire study period. Per patient 3 extra  
4 contact moments will be created. A standard questionnaire will be used to assess compliance and to  
5 address reasons for non-compliance. Crossover to another therapy arm will be discussed and  
6 discouraged.  
7  
8  
9

#### 10 11 12 13 14 Outcomes

15  
16 The primary outcome is the proportion of patients with PTS at the end of follow-up, 24 months after  
17 DVT. PTS is defined as a Villalta score of  $\geq 5$  at two consecutive visits that are at least three months  
18 apart. Although the consensus is to diagnose PTS at the 6-month visit or later based on one single  
19 Villalta score  $\geq 5$ <sup>24</sup>, we modelled this study after the preceding management study in which two  
20 consecutive Villalta scores  $\geq 5$  were needed for the diagnosis PTS. We observed that a proportion of  
21 patients (about 12%) had fluctuating Villalta scores beyond 6 months after the acute event of DVT.  
22 Assigning the diagnosis based on one single score  $\geq 5$  would therefore lead to misclassification and  
23 overestimation of the PTS incidence. The Villalta scores at 6 months will be available; therefore also  
24 the proportion of patients with PTS according to the consensus scoring method will be presented.  
25  
26  
27  
28  
29  
30  
31  
32  
33  
34  
35

36 Secondary outcomes include:

37  
38 1. HRQOL, measured by questionnaires (SF-36<sup>20</sup>, EuroQOL-5D<sup>21</sup>, Dutch translated Veines-QoL<sup>23</sup>, 2.  
39 Costs<sup>22</sup>, 3. Recurrent thrombosis, according to criteria as published<sup>25</sup> and assessed by objective  
40 tests, 4. VTE related death during follow-up, assessed by an independent and blinded adjudication  
41 committee, 5. Patient preferences, assessed with a Discrete Choice Experiment (DCE)<sup>26</sup>.  
42  
43  
44  
45  
46  
47  
48

49 Since both effects on costs and generic health-related quality of life are to be expected, the method of  
50 economic evaluation is a cost-utility analysis (CUA). The analysis will be from a societal perspective.  
51 The primary effect parameter is generic health-related quality of life, measured in quality adjusted life  
52 years (QALYs). We will perform two analyses: a trial based CUA with a time horizon of two years  
53 (identical to the duration of follow up in the clinical study), and a model-based CUA with a lifelong time  
54  
55  
56  
57  
58  
59  
60

1  
2  
3 horizon. For the latter, we will follow the guidelines of good modelling.<sup>27</sup> We will be able to adapt a  
4 Markov model for diagnostic strategies in DVT, which was developed by our group earlier.<sup>28</sup> Costs in  
5 the economic analyses include direct health care costs (medical costs for prevention, diagnostics,  
6 therapy, rehabilitation and care), direct non-health care costs (travel costs) and indirect costs  
7 (productivity loss). Utilities will be calculated from the responses on the EQ-5D and SF36 classification  
8 systems using the available multi-attribute utility functions.<sup>29 30</sup>

9  
10  
11  
12  
13  
14 The results of the DCE will provide insight in the trade-offs patients make between characteristics of  
15 the therapy. More specifically, we will investigate what duration of ECS therapy, with its drawbacks,  
16 patients consider to be acceptable.  
17  
18  
19

#### 20 21 Sample size calculation

22  
23 The proposed study is a non-inferiority trial and aims to demonstrate that the assessed alternative  
24 therapy based on ECS for 6 months followed by individually prolonged ECS therapy based on Villalta  
25 scores is not worse than the comparator ECS therapy for a standard duration of 24 months, by more  
26 than the prespecified amount of 7.5% (the non-inferiority margin). The published incidence of PTS  
27 following two years of ECS lies between 20 and 30%. (Prandoni 24.5% (95% CI 15.6- 33.4), Brandjes  
28 20% (95% CI 12.4-29.2) As it is statistically impossible to demonstrate equivalence (prove the H0 of  
29 no difference), Blackwelder proposed a one sided significance test to reject the null hypothesis by a  
30 clinically acceptable amount.<sup>31</sup> If we allow a difference of 7.5% in the outcome PTS between the group  
31 with ECS for 2 years and the group with the alternative therapy, 70% of the effect will be preserved.  
32 This proportion of loss in efficacy is customarily accepted in controlled randomized clinical trials. At a  
33 one sided significance level of 0.05 and a power of 80%, with a ratio of 1, a total of 847 patients is  
34 needed to provide sufficient patients for an adequately powered trial.<sup>31 32</sup> Loss to follow-up of patients  
35 is expected to be less than 2% since the intervention does not have an invasive nature. Therefore, a  
36 total of 864 patients are needed (432 patients per treatment arm).  
37  
38  
39  
40  
41  
42  
43  
44  
45  
46  
47  
48  
49

#### 50 51 Statistical analysis

52  
53 Descriptive statistics of the total population and of the two treatment groups separately will be  
54 computed to provide baseline characteristics of the patients in both treatment arms.  
55  
56  
57  
58  
59  
60

1  
2  
3 For the primary outcome PTS, univariate analysis of all proportions will be performed with logistic  
4 regression (chi-squared) analysis. Kaplan-Meier method will be used to calculate the cumulative  
5 incidences of PTS, adjusted for centre, to compare incidence rates between the two treatment arms.  
6  
7 Patients who die or are lost to follow-up will be censored at their last visit. ANOVA will be applied to  
8 assess the changes over time for different outcome measures.  
9  
10 Hazard ratio's and 95% confidence intervals for both treatment arms will be calculated using Cox  
11 regression models. Hazard ratio's will be adjusted for age, sex, clinical presentation of DVT, and  
12 extent of the index deep vein thrombosis.  
13  
14  
15  
16  
17  
18  
19

#### 20 Interim analysis (safety)

21 A prespecified safety analysis will be performed when 50% of the subjects have completed the 2-year  
22 follow-up. The analysis will be performed by the coordinating centre, and supervised by the principal  
23 investigators. The safety analysis will be performed to assess significant enhanced risk of PTS or  
24 excess morbidity/mortality in the intervention arm of the study population. Fisher's exact test will be  
25 performed to compare incidence of PTS at a significance level of 0.05 (two sided). The study can  
26 be stopped in case of significant excess morbidity/mortality in the alternative treatment arm.  
27  
28  
29  
30  
31  
32  
33

#### 34 Ethical considerations

35 The medical ethical committee of the Maastricht University Medical centre approved this study. All  
36 patients are extensively informed about the study, and written informed consent is obtained from all  
37 participating patients.  
38  
39  
40  
41  
42

#### 43 Discussion

44 Based on current knowledge the broad application of ECS therapy after DVT is questioned. The  
45 results of a recently published trial performed by Kahn et al. refuted the routine wearing of ECS after  
46 DVT altogether (ref). This study showed no treatment effect at all from ECS therapy (graduated ECS  
47 30-40 mmHg) compared to placebo ECS therapy (5 mmHg). This is in sharp contrast to the large  
48 treatment effects found in previous non-placebo controlled trials.<sup>67</sup> The unexpected lack of  
49 effectiveness cannot be dismissed solely as a placebo effect. The compliance to ECS therapy, a major  
50 determinant of effectiveness, was 55.6% after 24 months, much less than in the previous trials by  
51  
52  
53  
54  
55  
56  
57  
58  
59  
60

1  
2  
3 Brandjes and Prandoni et al, where compliance was considerably higher, up to 90%.<sup>67 18</sup> Therefore  
4 the definitive answer on the usefulness of ECS therapy for the prevention of PTS is not yet provided.  
5  
6 The need for the IDEAL DVT remains unchanged. The benefit to individual patients and the optimal  
7 duration of ECS therapy were never studied properly and as a result it is unclear which individual  
8 patients require therapy and for how long. The IDEAL DVT study will address the central questions  
9 that remain unanswered: What individual patients do benefit from ECS therapy and what is the  
10 optimal individual treatment duration? The study that we plan to perform is not only innovative; for the  
11 first time individual tailoring of duration of ECS therapy will be investigated, but also it will provide  
12 unique additional knowledge on the safety, effectiveness and cost- effectiveness of this approach. The  
13 IDEAL DVT study started including patients March 2011 and is currently on-going.  
14  
15  
16  
17  
18  
19  
20  
21  
22  
23  
24  
25  
26  
27  
28  
29  
30  
31  
32  
33  
34  
35  
36  
37  
38  
39  
40  
41  
42  
43  
44  
45  
46  
47  
48  
49  
50  
51  
52  
53  
54  
55  
56  
57  
58  
59  
60

**Trial status**

The IDEAL DVT study is currently in progress. Patient recruitment started March 15th 2011 and is still on-going.

**Acknowledgments**

The IDEAL DVT trial is funded by a grant from Zon-mW the Netherlands. ( 171102007)  
We especially acknowledge the participating investigators.

**Competing interests**

The authors declare that they have no competing interests.

**Funding**

This work was supported by Zon-mW the Netherlands grant number 171102007.

**Contributions**

AtC wrote the protocol and designed the study, the other authors MJ (cost-effectiveness research), MP (study design/statistics) and HtC (study design) contributed. AB is a PhD student and coordinator of the trial.

**Ethics approval**

Maastricht University Medical Centre.

The IDEAL investigators:

The Netherlands:

*Maastricht, Maastricht University Medical Centre*

Arina J ten Cate-Hoek MD, PhD (principal investigator)

Hugo ten Cate MD, PhD

Manuela Joore PhD

Annemieke C Bouman MD

*Groningen, University Medical Centre Groningen*

Karina Meijer MD PhD

1  
2  
3 *Amsterdam, Academic Medical Centre*

4 Saskia Middeldorp MD, PhD

6 Michiel Coppens MD, PhD

8 Mandy N Lauw MD

10 Yuk W Cheung MD

12 *Heerlen, Atrium Medical Centre*

14 Guy JM Mostard MD

16 Asiong Jie MD, PhD

18 *Hoorn, Westfriesgasthuis*

19 Simone M van den Heiligenberg MD

21 *Eindhoven, Maxima Medical Centre*

23 Lidwine W Tick MD, PhD

25 Marten R Nijziel MD, PhD

27 *Almere, Flevohospital*

28 Marije ten Wolde MD, PhD

30 Yuk W Cheung MD

32 *Amsterdam, OLVG*

34 Sanne van Wissen MD, PhD

36 Wim E Terpstra MD, PhD

38 *Roermond, Laurentius hospital*

39 Marlène HW van de Poel MD

41 *Amsterdam, Slotervaart hospital*

43 Hans-Martin Otten MD, PhD

45 *Amsterdam, VU Medical Centre*

47 Erik H Serné MD, PhD

49 *Nijmegen, Radboud University Nijmegen Medical Centre*

51 Edith H Klappe MD, PhD

53 Mirian CH Janssen MD, PhD

54 Tjerk de Nijs MD

56 Italy:

1  
2  
3 *Padua, Aziende Ospedaliera di Padova*

4 Paolo Prandoni MD ,PhD

6 *Treviso, Aziende ULSS*

8 Sabina Villalta MD  
9  
10  
11  
12  
13  
14  
15  
16  
17  
18  
19  
20  
21  
22  
23  
24  
25  
26  
27  
28  
29  
30  
31  
32  
33  
34  
35  
36  
37  
38  
39  
40  
41  
42  
43  
44  
45  
46  
47  
48  
49  
50  
51  
52  
53  
54  
55  
56  
57  
58  
59  
60

For peer review only

## References

1. Kahn SR, Shrier I, Julian JA, et al. Determinants and time course of the postthrombotic syndrome after acute deep venous thrombosis. *Ann Intern Med* 2008;**149**(10):698-707.
2. Prandoni P, Villalta S, Bagatella P, et al. The clinical course of deep-vein thrombosis. Prospective long-term follow-up of 528 symptomatic patients. *Haematologica* 1997;**82**(4):423-8.
3. Pesavento R, Villalta S, Prandoni P. The postthrombotic syndrome. *Intern Emerg Med* 2010;**5**(3):185-92.
4. Prandoni P, Kahn SR. Post-thrombotic syndrome: prevalence, prognostication and need for progress. *Br J Haematol* 2009;**145**(3):286-95.
5. Bergqvist D, Jendteg S, Johansen L, et al. Cost of long-term complications of deep venous thrombosis of the lower extremities: an analysis of a defined patient population in Sweden. *Ann Intern Med* 1997;**126**(6):454-7.
6. Brandjes DP, Buller HR, Heijboer H, et al. Randomised trial of effect of compression stockings in patients with symptomatic proximal-vein thrombosis. *Lancet* 1997;**349**(9054):759-62.
7. Prandoni P, Lensing AW, Prins MH, et al. Below-knee elastic compression stockings to prevent the post-thrombotic syndrome: a randomized, controlled trial. *Ann Intern Med* 2004;**141**(4):249-56.
8. Partsch H, Blattler W. Compression and walking versus bed rest in the treatment of proximal deep venous thrombosis with low molecular weight heparin. *J Vasc Surg* 2000;**32**(5):861-9.
9. Partsch H, Kaulich M, Mayer W. Immediate mobilisation in acute vein thrombosis reduces post-thrombotic syndrome. *International angiology : a journal of the International Union of Angiology* 2004;**23**(3):206-12.
10. Ginsberg JS, Hirsh J, Julian J, et al. Prevention and treatment of postphlebotic syndrome: results of a 3-part study. *Arch Intern Med* 2001;**161**(17):2105-9.
11. Aschwanden M, Jeanneret C, Koller MT, et al. Effect of prolonged treatment with compression stockings to prevent post-thrombotic sequelae: a randomized controlled trial. *J Vasc Surg* 2008;**47**(5):1015-21.
12. Ten Cate-Hoek AJ, Ten Cate H, Tordoir J, et al. Individually tailored duration of elastic compression therapy in relation to incidence of the postthrombotic syndrome. *J Vasc Surg* 2010;**52**(1):132-8.
13. CBO. *CBO Richtlijn Diagnostiek, preventie en behandeling van veneuze trombo-embolie en secundaire preventie van arteriele trombose*. Utrecht: Kwaliteitsinstituut voor de Gezondheidszorg CBO, 2008.
14. Hirsh J, Guyatt G, Albers GW, et al. Antithrombotic and thrombolytic therapy: American College of Chest Physicians Evidence-Based Clinical Practice Guidelines (8th Edition). *Chest* 2008;**133**(6 Suppl):110S-12S.
15. Blattler W. Aspects of cost effectiveness in therapy of acute leg/pelvic vein thrombosis. *Wien Med Wochenschr* 1999;**149**(2-4):61-5.
16. Gelderblom GJ, Hagedoorn-Meuwissen EAV. Kousen uittrekhulpmiddel Easy-Lever. Een onderzoek naar bruikbaarheid, effecten en belemmeringen, in opdracht van ZonMw. 2005(juni).
17. Raju S, Hollis K, Neglen P. Use of compression stockings in chronic venous disease: patient compliance and efficacy. *Ann Vasc Surg* 2007;**21**(6):790-5.
18. Kahn SR, Shapiro S, Wells PS, et al. Compression stockings to prevent post-thrombotic syndrome: a randomised placebo-controlled trial. *Lancet* 2013.
19. Villalta S, Bagatella P, Picolli A, et al. Assessment of validity and reproducibility of a clinical scale for the post thrombotic syndrome. *Haemostasis* 1994(24):158a.



- 1
  - 2
  - 3
  - 4
  - 5
  - 6
  - 7
  - 8
  - 9
  - 10
  - 11
  - 12
  - 13
  - 14
  - 15
  - 16
  - 17
  - 18
  - 19
  - 20
  - 21
  - 22
  - 23
  - 24
  - 25
  - 26
  - 27
  - 28
  - 29
  - 30
  - 31
  - 32
  - 33
  - 34
  - 35
  - 36
  - 37
  - 38
  - 39
  - 40
  - 41
  - 42
  - 43
  - 44
  - 45
  - 46
  - 47
  - 48
  - 49
  - 50
  - 51
  - 52
  - 53
  - 54
  - 55
  - 56
  - 57
  - 58
  - 59
  - 60
20. Aaronson NK, Muller M, Cohen PD, et al. Translation, validation, and norming of the Dutch language version of the SF-36 Health Survey in community and chronic disease populations. *J Clin Epidemiol* 1998;**51**(11):1055-68.
21. Brooks R. EuroQol: the current state of play. *Health Policy* 1996;**37**(1):53-72.
22. Brouwer W. Handleiding voor het gebruik van PRODISQ versie 2.1 (PROductivity and DISease Questionnaire). Een modulaire vragenlijst over de relatie tussen ziekte en productiviteitskosten. Toepasbaar bij economische evaluaties van gezondheidszorgprogramma's voor patiënten en werknemers. Rotterdam/Maastricht 2004
23. Kahn SR, Lamping DL, Ducruet T, et al. VEINES-QOL/Sym questionnaire was a reliable and valid disease-specific quality of life measure for deep venous thrombosis. *J Clin Epidemiol* 2006;**59**(10):1049-56.
24. Kahn SR, Partsch H, Vedantham S, et al. Definition of post-thrombotic syndrome of the leg for use in clinical investigations: a recommendation for standardization. *J Thromb Haemost* 2009;**7**(5):879-83.
25. Prandoni P, Lensing AW, Bernardi E, et al. The diagnostic value of compression ultrasonography in patients with suspected recurrent deep vein thrombosis. *Thromb Haemost* 2002;**88**(3):402-6.
26. Lancaster K. A new approach to consumer theory. *J Polit Econ* 1966(74):132-57.
27. Weinstein MC, O'Brien B, Hornberger J, et al. Principles of good practice for decision analytic modeling in health-care evaluation: report of the ISPOR Task Force on Good Research Practices--Modeling Studies. *Value Health* 2003;**6**(1):9-17.
28. Ten Cate-Hoek AJ, Toll DB, Buller HR, et al. Cost-effectiveness of ruling out deep venous thrombosis in primary care versus care as usual. *J Thromb Haemost* 2009;**7**(12):2042-9.
29. Brazier J, Roberts J, Deverill M. The estimation of a preference-based measure of health from the SF-36. *Journal of health economics* 2002;**21**(2):271-92.
30. Dolan P. Modeling valuations for EuroQol health states. *Medical care* 1997;**35**(11):1095-108.
31. Blackwelder WC. "Proving the null hypothesis" in clinical trials. *Control Clin Trials* 1982;**3**(4):345-53.
32. Laster LL, Johnson MF. Non-inferiority trials: the 'at least as good as' criterion. *Stat Med* 2003;**22**(2):187-200.

1  
2  
3  
4  
5  
6  
7  
8  
9  
10  
11  
12  
13  
14  
15  
16  
17  
18  
19  
20  
21  
22  
23  
24  
25  
26  
27  
28  
29  
30  
31  
32  
33  
34  
35  
36  
37  
38  
39  
40  
41  
42  
43  
44  
45  
46  
47  
48  
49  
50  
51  
52  
53  
54  
55  
56  
57  
58  
59  
60

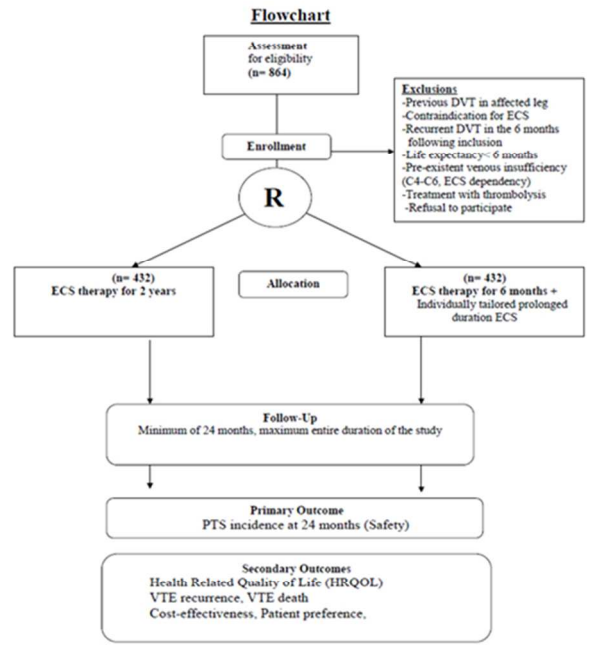

Study flow diagram  
254x190mm (96 x 96 DPI)

Review only

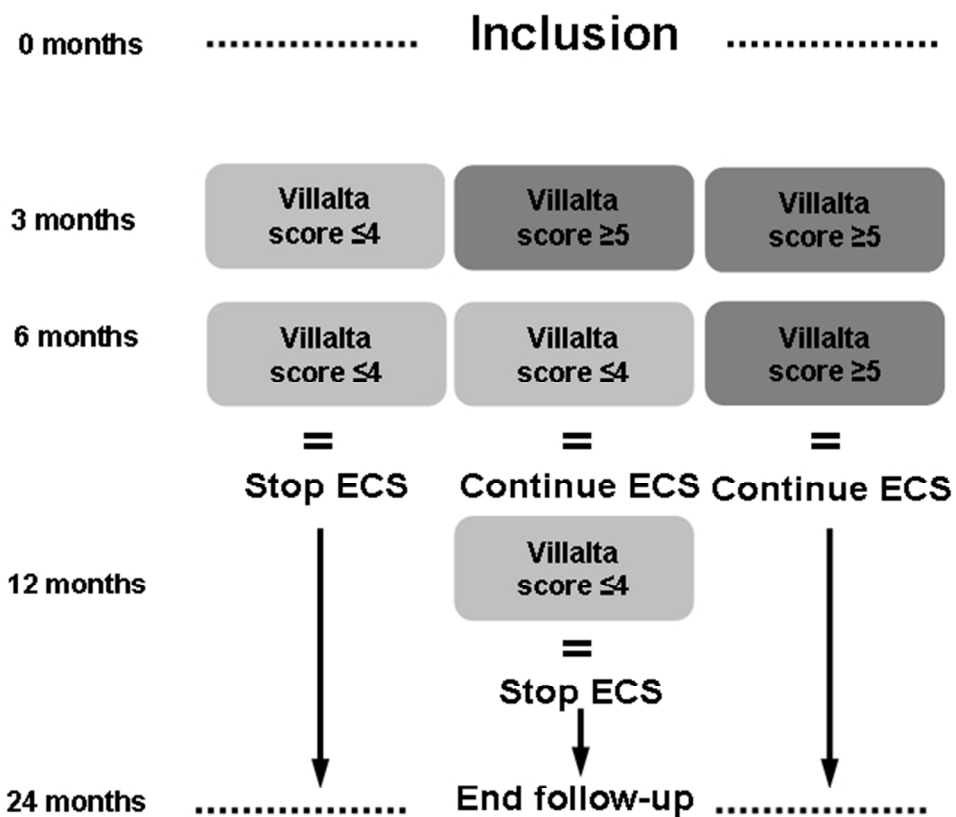

Algorithm individually tailored ECS therapy  
177x161mm (96 x 96 DPI)

only

1  
2  
3  
4  
5  
6  
7  
8  
9  
10  
11  
12  
13  
14  
15  
16  
17  
18  
19  
20  
21  
22  
23  
24  
25  
26  
27  
28  
29  
30  
31  
32  
33  
34  
35  
36  
37  
38  
39  
40  
41  
42  
43  
44  
45  
46  
47  
48  
49  
50  
51  
52  
53  
54  
55  
56  
57  
58  
59  
60

# BMJ Open

## The IDEAL DVT study, individualized duration elastic compression therapy against long-term duration of therapy for the prevention of post thrombotic syndrome, a randomized controlled trial

|                                 |                                                                                                                                                                                                                                                                                                                                                                                                                                                                                                                                                                                                                                                                                                                                                                                                                    |
|---------------------------------|--------------------------------------------------------------------------------------------------------------------------------------------------------------------------------------------------------------------------------------------------------------------------------------------------------------------------------------------------------------------------------------------------------------------------------------------------------------------------------------------------------------------------------------------------------------------------------------------------------------------------------------------------------------------------------------------------------------------------------------------------------------------------------------------------------------------|
| Journal:                        | <i>BMJ Open</i>                                                                                                                                                                                                                                                                                                                                                                                                                                                                                                                                                                                                                                                                                                                                                                                                    |
| Manuscript ID:                  | bmjopen-2014-005265.R1                                                                                                                                                                                                                                                                                                                                                                                                                                                                                                                                                                                                                                                                                                                                                                                             |
| Article Type:                   | Protocol                                                                                                                                                                                                                                                                                                                                                                                                                                                                                                                                                                                                                                                                                                                                                                                                           |
| Date Submitted by the Author:   | 08-May-2014                                                                                                                                                                                                                                                                                                                                                                                                                                                                                                                                                                                                                                                                                                                                                                                                        |
| Complete List of Authors:       | ten Cate, Arina; Maastricht University Medical Centre, Laboratory for Thrombosis and Hemostasis; Maastricht University Medical Center, Internal Medicine<br>Bouman, Annemieke; Maastricht University Medical Centre, Laboratory for Thrombosis and Hemostasis; Maastricht University Medical Center, Internal Medicine<br>Joore, Manuela; Maastricht University Medical Centre, Department of Clinical Epidemiology and Medical Technology Assessment (KEMTA)<br>Prins, Martin; Maastricht University Medical Center, Epidemiology; Maastricht University Medical Centre, Department of Clinical Epidemiology and Medical Technology Assessment (KEMTA)<br>ten Cate, Hugo; Maastricht University Medical Center, Internal Medicine; Maastricht University Medical Centre, Laboratory for Thrombosis and Hemostasis |
| <b>Primary Subject Heading</b>: | Cardiovascular medicine                                                                                                                                                                                                                                                                                                                                                                                                                                                                                                                                                                                                                                                                                                                                                                                            |
| Secondary Subject Heading:      | Haematology (incl blood transfusion), Health economics                                                                                                                                                                                                                                                                                                                                                                                                                                                                                                                                                                                                                                                                                                                                                             |
| Keywords:                       | Post thrombotic syndrome, Deep vein thrombosis, Elastic compression stocking therapy, Protocol, RCT                                                                                                                                                                                                                                                                                                                                                                                                                                                                                                                                                                                                                                                                                                                |
|                                 |                                                                                                                                                                                                                                                                                                                                                                                                                                                                                                                                                                                                                                                                                                                                                                                                                    |

SCHOLARONE™  
Manuscripts

1  
2  
3 Study Protocol

4 The IDEAL DVT study, individualized duration elastic compression therapy against long-term duration  
5 of therapy for the prevention of post thrombotic syndrome, a randomized controlled trial  
6  
7  
8  
9

10  
11  
12  
13  
14  
15 Authors: Arina J ten Cate-Hoek<sup>1,2</sup>, Annemieke C Bouman<sup>1,2</sup>, Manuela Joore<sup>3</sup>, Martin Prins<sup>3,4</sup>, Hugo  
16 ten Cate<sup>1,2</sup>, for the IDEAL DVT trial investigators.  
17  
18

19  
20  
21 Corresponding author: Arina J ten Cate-Hoek MD, PhD.  
22

23 Address: P Debyelaan 25  
24

25 6229 HX Maastricht  
26

27 E-mail: [arina.tencate@maastrichtuniversity.nl](mailto:arina.tencate@maastrichtuniversity.nl)  
28

29 Telephone number: 0031(0)43-3871243  
30

31 Fax number: 0031(0)43-3876096  
32  
33

34 <sup>1</sup>Laboratory for Thrombosis and Hemostasis, Maastricht University Medical Centre, Maastricht, the  
35 Netherlands  
36

37 <sup>2</sup>Department of Internal Medicine, Maastricht University Medical Centre, Maastricht, the Netherlands  
38

39 <sup>3</sup>Department of Clinical Epidemiology and Medical Technology Assessment (KEMTA), Maastricht  
40 University Medical Center, Maastricht, The Netherlands  
41

42 <sup>4</sup>Department of Epidemiology, Care and Public Health Research Institutes, Maastricht University,  
43 Maastricht, the Netherlands  
44  
45  
46  
47  
48

49 Key words: Post thrombotic syndrome, deep vein thrombosis, elastic compression stocking therapy,  
50 protocol, RCT  
51

52 Word count: 3345  
53  
54  
55  
56  
57  
58  
59  
60

**Abstract****Introduction:**

Post thrombotic syndrome (PTS) is a serious complication of deep vein thrombosis (DVT) of the leg that affects 20-50% of patients. Once a patient experiences PTS there is no treatment that effectively reduces the debilitating complaints. Two randomized controlled trials showed that elastic compression stocking (ECS) therapy after DVT for 24 months can reduce the incidence of PTS by 50%. However, it is unclear whether all patients benefit to the same extent from ECS therapy or what the optimal duration of therapy for individual patients should be. ECS therapy is costly, inconvenient, demanding and sometimes even debilitating. Tailoring therapy to individual needs could save substantial costs. The objective of the IDEAL DVT study therefore is to evaluate whether tailoring the duration of ECS therapy on signs and symptoms of the individual patient is a safe and effective method to prevent PTS, compared to standard ECS therapy.

**Methods and analysis:**

A multicentre, single-blinded, allocation concealed, randomized, non-inferiority trial. A total of 864 consecutive patients with acute objectively documented proximal DVT of the leg are randomized to either standard duration of 24 months or tailored duration of ECS therapy following an initial therapeutic period of 6 months. Signs and symptoms of PTS are recorded at regular clinic visits. Furthermore, quality of life, costs, patient preferences and compliance are measured. The primary outcome is the proportion of patients with PTS at 24 months.

**Ethics and dissemination:**

Based on current knowledge the standard application of ECS therapy is questioned. The IDEAL DVT study will address the central questions that remain unanswered: What individual patients do benefit from ECS therapy and what is the optimal individual treatment duration? Primary ethics approval was received from the Maastricht University Medical Centre.

Results of the study will be disseminated via peer-reviewed publications and presentations at scientific conferences.

**Trial Registration:**

NCT01429714 and NTR 2597

## Background

After deep vein thrombosis (DVT) 20-50% of patients develop post thrombotic syndrome (PTS). PTS is a chronic condition, characterized by leg complaints such as pain; heaviness; cramps; aching; tingling; and leg signs due to venous insufficiency, evolving in severe cases to venous ulceration of the leg that was affected by the DVT.<sup>1-5</sup> PTS is a serious affliction, with substantial impact on quality of life and costs.<sup>2,6</sup> Because an effective therapy is lacking, prevention of PTS is of major importance. Up till now, elastic compression stocking (ECS) therapy after DVT has been the mainstay of PTS prevention. The evidence sustaining the value of ECS therapy following acute DVT is derived from 2 randomized clinical trials, which showed that incidences of PTS were reduced by approximately 50%, with application of ECS therapy for 24 months.<sup>7,8</sup> However, based on these trials it is still undecided whether all patients benefit to the same extent from ECS therapy or what the optimal duration of ECS therapy for individual patients should be. We have previously assessed the safety of shortened duration of ECS therapy based on individual patient clinical scores in a management study of 125 patients, and we have shown that tailoring the duration of ECS therapy based on the signs and symptoms of the individual patient after an initial treatment period of 6 months, is a safe strategy to prevent PTS. We found that 50% of our patients did not need ECS therapy for as long as 2 years, while the overall incidence of PTS was 21.1% (95% CI 13.5- 28.7).<sup>9</sup> This incidence is comparable to published incidences after 24 months ECS therapy.<sup>7,8</sup> While this was a prospective management cohort study with an open character and therefore prone to bias, the results of this study need to be confirmed by an adequately powered randomized controlled trial. There have been other studies that highlighted different aspects of ECS therapy. ECS therapy may not be indicated for all patients as shown by a study that assessed whether ECS therapy initiated one year after the event of DVT would lower the incidence of PTS in patients without complaints but with reflux on duplex testing. No significant benefit of ECS therapy at this late time of onset was found. The incidence of PTS was low in both groups.<sup>10</sup> One study so far assessed whether prolonged duration of ECS therapy was superior to 6 months of ECS therapy following an event of proximal DVT. In this study no significant difference in the incidence of PTS according to the CEAP classification was observed between the two treatment groups.<sup>11</sup>

1  
2  
3 The proposed IDEAL (individually tailored elastic compression against (=versus) longterm therapy)  
4 DVT study is a non-inferiority trial and aims to demonstrate that the assessed alternative therapy  
5 based on ECS for 6 months followed by individually prolonged ECS therapy based on Villalta scores is  
6 non-inferior to the comparator ECS therapy for a standard duration of 24 months. In addition we are  
7 interested to study the cost-effectiveness of individual tailoring of the duration of ECS therapy via a  
8 cost-utility analysis (CUA) and we want to retrieve information on the patient's motivations for  
9 compliance or non-compliance to therapy. Because compliance to therapy is one of the most  
10 important prerequisites for successful ECS therapy, a discrete choice experiment (DCE) will be  
11 performed in which patient preferences towards ECS therapy will be assessed, in order to reveal the  
12 main obstacles for compliance to therapy. For this purpose, a DCE questionnaire will be send to a  
13 subset of the population (300 patients) at approximately 3 months after DVT.

14  
15  
16  
17  
18  
19  
20  
21  
22  
23 The results of a recently published placebo controlled trial performed by Kahn et al. refuted the routine  
24 wearing of ECS after DVT altogether.<sup>12</sup> This study showed no treatment effect at all from ECS therapy  
25 in contrast to the large treatment effects found in previous non-placebo controlled trials.<sup>7 8</sup> The  
26 unexpected lack of effectiveness cannot be dismissed solely as a placebo effect. The compliance to  
27 ECS therapy, a major determinant of effectiveness, was 55.6% after 24 months. This was less in  
28 comparison to the previous trials by Brandjes and Prandoni, where compliance was up to 90%.<sup>7 8 12</sup>  
29 Although a per protocol analysis of the patients reporting regular stocking use yielded the same  
30 outcome, this sub analysis may not be adequately powered to dismiss lack of compliance as an  
31 important determinant of non-effectiveness.

32  
33  
34  
35  
36  
37  
38  
39  
40  
41  
42  
43  
44  
45  
46  
47  
48  
49  
50  
51  
52  
53  
54  
55  
56  
57  
58  
59  
60  
Based on current knowledge it is therefore understood that the standard application of ECS therapy is  
questioned. Especially the benefit to individual patients and the optimal duration of ECS therapy were  
never studied properly and as a result it is unclear which individual patients require therapy and for  
how long.

The IDEAL DVT study aims to address these topics. In addition quality of life, patient preference  
towards ECS therapy, compliance to therapy, as well as cost-effectiveness of ECS therapy will be  
assessed.

The primary outcome of the IDEAL DVT study will be PTS at 24 months after the event. The  
secondary outcomes will be: 1. Health Related Quality Of Life, measured by questionnaires (SF-36<sup>13</sup>,  
EuroQOL-5D<sup>14</sup>, Dutch translated Veines-Qol<sup>15</sup>, 2. Costs<sup>16</sup>), 3. Recurrent thrombosis, according to



1  
2  
3 criteria as published<sup>17</sup> and assessed by objective tests, 4. VTE related death during follow-up,  
4 assessed by an independent and blinded adjudication committee, 5. Patient preferences, assessed  
5 with a Discrete Choice Experiment (DCE)<sup>18</sup>.  
6  
7  
8  
9

#### 10 The scope of the problem in the Netherlands

11  
12 In the Netherlands, each year around 25.000 patients experience a new event of DVT. In order to  
13 prevent PTS, common practice is to prescribe custom fitted ECS therapy for 2 years for all patients.<sup>19</sup>

14  
15 <sup>20</sup> ECS therapy is costly, demanding and sometimes even debilitating. Elderly patients can often not  
16 apply the ECS by themselves but need help from family or they even need home care visits (7.5%).<sup>21-</sup>  
17

18  
19 <sup>23</sup> Total annual costs of ECS therapy roughly amounts to 2.5 million euro for stockings (25.000  
20 patients\*100 euro) and 21 million euro for home care (7.5%\*25.000 patients\*500 visits\*20 euro).<sup>21-23</sup>  
21

22  
23 Moreover, the majority of patients do not experience any post thrombotic complaints.<sup>10</sup> In the  
24 Netherlands, over 10 million euro each year could be saved if ECS treatment would be individualized.  
25  
26  
27

#### 28 Methods/Design

29  
30 A multicentre, single-blinded, allocation concealed, randomized, non-inferiority trial comparing  
31 individually tailored duration of ECS therapy (intervention) with standard duration of 24 months ECS  
32 therapy (control), for the prevention of PTS. Randomization will guarantee a balanced distribution of  
33 patients within each patient group. Stratification will be performed on centre and potentially  
34 confounding effects such as age, sex and body mass index. The study will be a multicenter study in  
35 order to get a good representation of patients and to achieve sufficient patient numbers. The primary  
36 outcome will be PTS at 24 months after the event; the observers will be blinded to the allocated  
37 treatment arm. The allocation will be concealed from study personnel involved in assessing the leg  
38 symptoms and rating the PTS scores. Both randomization and allocation concealment are used as  
39 strategies against bias. The study is not double blinded; no inactive stockings will be used in the  
40 comparator group. The use of sham stockings will very likely interfere with the quality of life and will  
41 complicate the assessment of perceived differences between groups. Patients will be followed for the  
42 entire study duration; incidence of recurrent DVT and VTE related death during the follow-up period  
43 will be documented.  
44  
45  
46  
47  
48  
49  
50  
51  
52  
53  
54  
55  
56  
57  
58  
59  
60

## Patients and treatment

Consecutive, consenting adults with an acute objectively documented proximal DVT of the leg, adequately treated with anticoagulant treatment and initial compression therapy according to a prespecified protocol are included in the study. Patients are included and randomized in the IDEAL DVT study within 2-6 weeks after DVT.

### Exclusion criteria are:

- Previous DVT in the affected leg. Patients with a previous ipsilateral DVT might already have developed PTS after the first DVT.
- Recurrent DVT in the 6 months following inclusion, as it cannot be justified to advise these patients to discontinue ECS therapy 6 months after DVT.
- Pre-existent venous insufficiency (skin signs C3-C6 on CEAP score or requiring ECS therapy). Pre-existent venous insufficiency increases the risk of developing PTS and the majority of patients with venous insufficiency already chronically wear elastic compression stockings. In addition venous insufficiency is closely related to PTS and is therefore difficult to differentiate from PTS.
- Contraindication for ECS therapy such as intermittent claudication or clinical signs of leg ischemia or asymptomatic arterial insufficiency (a pulse deficit or bruit at sites of narrowing at physical examination).
- Active thrombolysis, as thrombolysis reduces the risk of PTS.
- Limited life expectancy (< 6 months), as the follow-up period is 2 years.

Patients are recruited from 12 hospitals in the Netherlands and 2 hospitals in Italy.

There is a prespecified protocol for the management of DVT in all participating centres.

In the initial acute phase after DVT, until the acute oedema has disappeared, one of three strategies will be applied. The leg is either bandaged with short stretch bandages to a compression of 30-40 mmHg, worn day and night and redressed twice per week; or a bandage stocking with 35mmHg compression is prescribed (Mediven Struva 35<sup>®</sup>, Medi, Breda, the Netherlands), worn day and night; or no initial compression therapy is applied, according to the prespecified strategy of the hospital protocol. After the initial phase, a custom fitted, flat knitted, knee length graduated elastic compression stocking class III (ankle pressure 40 mmHg) is prescribed for all patients. The same brand and type (Mediven 550) of compression stocking is prescribed to all patients in all participating centres.

1  
2  
3 Compression therapy with the elastic compression stocking is started immediately after the initial  
4 phase, so there is no period without compression in between, with exception of the patients who do  
5 not receive compression in the initial phase. Patients receive two new stockings every year. Patients  
6 are advised to wear the stockings during the daytime.  
7  
8  
9

#### 10 11 12 Procedures

13  
14 After obtaining written informed consent, randomization is performed centrally at the coordinating  
15 study centre, the Maastricht University Medical centre. Patients are included and randomized within 2-  
16 6 weeks after diagnosis of DVT. Patients are randomized to one of the two treatment arms. (Figure 1)  
17  
18 A web-based randomisation program (TENALEA (Trans European Network for Clinical Trials  
19 Services)) is used that executes blocked randomisation with stratification on centre-level and on  
20 possible confounding patient characteristics such as age, sex, and Body Mass Index (<26 kg/m<sup>2</sup> - ≥26  
21 kg/m<sup>2</sup>). Permuted blocks of randomly varying size are used to maintain balance of numbers in each  
22 treatment group and to ensure allocation concealment.  
23  
24  
25  
26  
27

28  
29 Information on allocation is only accessible to the study personnel at the coordinating study centre in  
30 Maastricht, and patients will receive information about their allocation via the coordinating study  
31 centre. The allocation will be concealed from study personnel involved in assessing the leg symptoms  
32 and rating the PTS scores. Patients are not blinded by the use of sham stockings, because they may  
33 influence quality of life, complicating the assessment of perceived differences between groups.  
34  
35 Patients are asked not to reveal their treatment allocation to their own physician, and not to wear the  
36 elastic compression stocking at the day of their outpatient clinic visits.  
37  
38  
39  
40  
41  
42

43  
44 All patients are advised to wear the elastic compression stocking during the first 6 months after DVT.  
45 In the control group, all patients are instructed to wear the elastic compression stocking daily for a total  
46 duration of 2 years. In the Intervention group, duration of ECS therapy is individually tailored based on  
47 Villalta scores.<sup>24</sup> After the first 6 months therefore, there are three scenarios:  
48  
49  
50

- 51 (1) The Villalta score at both the 3 and 6-month follow-up visit is ≤ 4. Then the patient is advised  
52 to discontinue ECS therapy.  
53
- 54 (2) The Villalta score at the 3-month follow-up visit is ≥ 5 the Villalta score at the 6 month follow-  
55 up visit is ≤ 4. The patient is advised to continue the ECS therapy for another 6 months. If the  
56  
57  
58  
59  
60

1  
2  
3 Villalta score at the 12 month follow-up visit is  $\leq 4$ , the patient is allowed to discontinue the  
4  
5 ECS therapy,

- 6  
7 (3) The Villalta score is  $\geq 5$  at both the 3 and 6 months follow-up visit. The patient is advised to  
8  
9 continue the ECS therapy for a total duration of 24 months. (Figure 2)

10  
11  
12 Using this algorithm the duration of ECS therapy is individually tailored in each patient. The decision  
13  
14 on the duration of ECS therapy in patients in the intervention group is made centrally at the  
15  
16 coordinating study centre, as only there the information on treatment allocation is available. The  
17  
18 patient is informed about the decisions on the (dis) continuation of the ECS therapy by the  
19  
20 coordinating centre.

21  
22 **When a patient develops symptoms and signs of PTS after discontinuation of ECS therapy, a**  
23  
24 **predefined protocol is followed. If necessary, ECS treatment will be reinstated.**

#### 25 26 27 Follow-up

28  
29 All patients are followed for 24 months after DVT. During these 24 months they visit the outpatient  
30  
31 clinic 4 times: at 3, 6, 12, and 24 months after the DVT. At each follow-up visit the signs of PTS will be  
32  
33 recorded and scored, by the study nurse or the treating physician, using the objective part of the  
34  
35 Villalta clinical scale for PTS.<sup>24</sup> In case of intermittent leg complaints or signs or symptoms suspect of  
36  
37 recurrent VTE, patients are instructed to visit their treating physician. Study documentation will be  
38  
39 filled out and adverse events will be recorded. The CCMO (central committee human related research)  
40  
41 will be notified in case of serious adverse events or death.

42  
43 The patient is asked to fill out 5 questionnaires: at baseline, and 3, 6, 12 and 24 months later. All  
44  
45 questionnaires will be offered as a web based application, each patient will have a unique personal  
46  
47 entry code. For patients who are not able or willing to use the electronic questionnaires, a paper  
48  
49 version will be available. The first questionnaire is filled out shortly after inclusion (4-6 weeks after  
50  
51 DVT) and the subsequent questionnaires are filled out the day before each follow-up visit. All  
52  
53 questionnaires contain the subjective part of the Villalta clinical scale for PTS<sup>24</sup>, questions on ECS  
54  
55 compliance, a cost questionnaire<sup>16</sup>, and three health related quality of life (HRQOL) questionnaires:  
56  
57 the Dutch translated Veines-Qol<sup>15</sup>, the SF-36<sup>13</sup>, and the EuroQOL-5D<sup>14</sup>. In a subset of the study  
58  
59 population patient preferences regarding elastic compression therapy will be analysed, by conducting  
60

1  
2  
3 a discrete choice experiment (DCE). For this purpose, a DCE questionnaire will be send to a subset of  
4 the population at approximately 3 months after DVT.  
5  
6

7 Compliance to ECS therapy is monitored in two ways. Each questionnaire contains a question on  
8 compliance to the advised version of ECS therapy. Because compliance and adherence to therapy is  
9 of crucial importance the number of contact moments for the assessment of compliance with ECS  
10 therapy will be increased by adding telephone contacts to the regular clinical visits. Study-supporting  
11 staff will make computer-assisted random telephone calls during the entire follow-up period to both the  
12 patients in the group with the 2-year ECS intervention and to patients in the group with individualized  
13 ECS therapy. The telephone calls will be made randomly to create a surprise effect (patients are off  
14 guard) and to allow for a distribution of contacts over the entire study period. Per patient 3 extra  
15 contact moments will be created. A standard questionnaire will be used to assess compliance and to  
16 address reasons for non-compliance. Crossover to another therapy arm will be discussed and  
17 discouraged.  
18  
19  
20  
21  
22  
23  
24  
25  
26  
27  
28

### 29 Outcomes

30  
31 The primary outcome is the proportion of patients with PTS at the end of follow-up, 24 months after  
32 DVT. PTS is defined as a Villalta score of  $\geq 5$  at two consecutive visits that are at least three months  
33 apart. **The time point of the second Villalta score of  $\geq 5$  will be considered the time point of PTS**  
34 **diagnosis.** Although the consensus is to diagnose PTS at the 6-month visit or later based on one  
35 single Villalta score  $\geq 5$ <sup>25</sup>, we modelled this study after the preceding management study in which two  
36 consecutive Villalta scores  $\geq 5$  were needed for the diagnosis PTS. We observed that a proportion of  
37 patients (about 12%) had fluctuating Villalta scores beyond 6 months after the acute event of DVT.<sup>9</sup>  
38 Assigning the diagnosis based on one single score  $\geq 5$  would therefore lead to misclassification and  
39 overestimation of the PTS incidence. The Villalta scores at 6 months will be available; therefore also  
40 the proportion of patients with PTS according to the consensus scoring method will be presented.  
41  
42  
43  
44  
45  
46  
47  
48  
49  
50

51 Secondary outcomes include:

- 52  
53 1. HRQOL, measured by questionnaires (SF-36<sup>13</sup>, EuroQOL-5D<sup>14</sup>, Dutch translated Veines-Qol<sup>15</sup>), 2.  
54 Costs<sup>16</sup>, 3. Recurrent thrombosis, according to criteria as published<sup>17</sup> and assessed by objective  
55  
56  
57  
58  
59  
60

1  
2  
3 tests, 4. VTE related death during follow-up, assessed by an independent and blinded adjudication  
4 committee, 5. Patient preferences, assessed with a Discrete Choice Experiment (DCE)<sup>18</sup>.

6  
7  
8 Since both effects on costs and generic health-related quality of life are to be expected, the method of  
9 economic evaluation is a cost-utility analysis (CUA). The analysis will be from a societal perspective.  
10 The primary effect parameter is generic health-related quality of life, measured in quality adjusted life  
11 years (QALYs). We will perform two analyses: a trial based CUA with a time horizon of two years  
12 (identical to the duration of follow up in the clinical study), and a model-based CUA with a lifelong time  
13 horizon. For the latter, we will follow the guidelines of good modelling.<sup>26</sup> We will be able to adapt a  
14 Markov model for diagnostic strategies in DVT, which was developed by our group earlier.<sup>27</sup> Costs in  
15 the economic analyses include direct health care costs (medical costs for prevention, diagnostics,  
16 therapy, rehabilitation and care), direct non-health care costs (travel costs) and indirect costs  
17 (productivity loss). Utilities will be calculated from the responses on the EQ-5D and SF36 classification  
18 systems using the available multi-attribute utility functions.<sup>28 29</sup> Incremental cost-utility ratios will be  
19 calculated, and non-parametric bootstrap analyses will be used to quantify the uncertainty surrounding  
20 the cost-utility ratio of the trial-based analysis. Sensitivity analyses and subgroup analyses will be  
21 performed, to assess the impact of variation in parameters and heterogeneity of the patient population.  
22 ECS therapy has several disadvantages for the patients (stockings are uncomfortable, ugly, and  
23 difficult to put on and off), while duration and effectiveness are uncertain. A DCE will be conducted to  
24 assess the patient preferences regarding ECS therapy, providing insight in the trade-offs patients  
25 make between characteristics of the therapy when deciding to wear the stocking or not. Duration of  
26 ECS therapy is one of the characteristics. Data will be analysed using multinomial logit models and  
27 mixed logit models.(Nlogit, Econometric Software)

#### 28 29 30 31 32 33 34 35 36 37 38 39 40 41 42 43 44 45 46 47 Sample size calculation

48 The proposed study is a non-inferiority trial and aims to demonstrate that the assessed alternative  
49 therapy based on ECS for 6 months followed by individually prolonged ECS therapy based on Villalta  
50 scores is not worse than the comparator ECS therapy for a standard duration of 24 months, by more  
51 than the prespecified amount of 7.5% (the non-inferiority margin). The published incidence of PTS  
52 following two years of ECS lies between 20 and 30%. (Prandoni 24.5% (95% CI 15.6- 33.4), Brandjes  
53  
54  
55  
56  
57  
58  
59  
60

1  
2  
3 20% (95% CI 12.4-29.2)<sup>7 8</sup> As it is statistically impossible to demonstrate equivalence (prove the H0 of  
4 no difference), Blackwelder proposed a one sided significance test to reject the null hypothesis by a  
5 clinically acceptable amount.<sup>30</sup> If we allow a difference of 7.5% in the outcome PTS between the group  
6 with ECS for 2 years and the group with the alternative therapy, 70% of the effect will be preserved.  
7  
8 This proportion of loss in efficacy is customarily accepted in controlled randomized clinical trials. At a  
9  
10 one sided significance level of 0.05 and a power of 80%, with a ratio of 1, a total of 847 patients is  
11  
12 needed to provide sufficient patients for an adequately powered trial.<sup>30 31</sup> Loss to follow-up of patients  
13  
14 is expected to be less than 2% since the intervention does not have an invasive nature. Therefore, a  
15  
16 total of 864 patients are needed (432 patients per treatment arm).  
17  
18  
19

## 20 21 Statistical analysis

22 Descriptive statistics of the total population and of the two treatment groups separately will be  
23  
24 computed to provide baseline characteristics of the patients in both treatment arms.  
25

26 For the primary outcome PTS, univariate analysis of all proportions will be performed with logistic  
27  
28 regression (chi-squared) analysis. Kaplan-Meier method will be used to calculate the cumulative  
29  
30 incidences of PTS, adjusted for centre, to compare incidence rates between the two treatment arms.  
31  
32 Patients who die or are lost to follow-up will be censored at their last visit. ANOVA will be applied to  
33  
34 assess changes over time, **by comparing** different outcome measures **at the different time points of**  
35  
36 **follow-up.**

37 Hazard ratio's and 95% confidence intervals for both treatment arms will be calculated using Cox  
38  
39 regression models. Hazard ratio's will be **stratified for centre** and adjusted for age, sex, **BMI**, clinical  
40  
41 presentation of DVT, and extent of the index deep vein thrombosis.  
42  
43  
44

## 45 Interim analysis (safety)

46 A prespecified safety analysis will be performed when 50% of the subjects have completed the 2-year  
47  
48 follow-up. The analysis will be performed by the coordinating centre, and supervised by the principal  
49  
50 investigators. The safety analysis will be performed to assess significant enhanced risk of PTS or  
51  
52 excess morbidity/mortality in the intervention arm of the study population. Fisher's exact test will be  
53  
54 performed to compare incidence of PTS at a significance level of 0.05 (two sided). The study can  
55  
56 be stopped in case of significant excess morbidity/mortality in the alternative treatment arm.  
57  
58  
59  
60

1  
2  
3  
4  
5 Ethical considerations

6 The medical ethical committees of all participating hospitals in the Netherlands and Italy approved this  
7 study. All patients are extensively informed about the study, and written informed consent is obtained  
8 from all participating patients.  
9  
10

### 11 12 13 **Discussion**

14 Based on current knowledge the standard application of ECS therapy after DVT is questioned. The  
15 definitive answer on the usefulness of ECS therapy for the prevention of PTS is not yet provided.  
16 Therefore the need for the IDEAL DVT study remains unchanged. The benefit to individual patients  
17 and the optimal duration of ECS therapy were never studied properly and as a result it is unclear  
18 which individual patients require therapy and for how long. The IDEAL DVT study will address the  
19 central questions that remain unanswered: What individual patients do benefit from ECS therapy and  
20 what is the optimal individual treatment duration? The study that we plan to perform is not only  
21 innovative; for the first time individual tailoring of duration of ECS therapy will be investigated, but also  
22 it will provide unique additional knowledge on the safety, effectiveness and cost- effectiveness of this  
23 approach. The IDEAL DVT study started including patients March 2011 and is currently on-going.  
24 Recruitment is expected to be terminated within 1 year. As the follow-up is 2 years, the results are  
25 expected within 3 years.  
26  
27  
28  
29  
30  
31  
32  
33  
34  
35  
36  
37  
38  
39  
40  
41  
42  
43  
44  
45  
46  
47  
48  
49  
50  
51  
52  
53  
54  
55  
56  
57  
58  
59  
60



**Trial status**

The IDEAL DVT study is currently in progress. Patient recruitment started March 15th 2011 and is still on-going.

**Acknowledgments**

The IDEAL DVT trial is funded by a grant from Zon-mW the Netherlands. ( 171102007)

We especially acknowledge the participating investigators.

**Competing interests**

The authors declare that they have no competing interests.

**Funding**

This work was supported by Zon-mW the Netherlands grant number 171102007.

**Contributions**

AtC wrote the protocol and designed the study, the other authors MJ (cost-effectiveness research), MP (study design/statistics) and HtC (study design) contributed. AB is a PhD student and coordinator of the trial.

**Ethics approval**

Maastricht University Medical Centre.

1  
2  
3 The IDEAL DVT investigators:

4 The Netherlands:

5  
6 *Maastricht, Maastricht University Medical Centre*

7  
8 Arina J ten Cate-Hoek MD, PhD (principal investigator)

9  
10 Hugo ten Cate MD, PhD

11  
12 Manuela Joore PhD

13  
14 Annemieke C Bouman MD

15  
16 *Groningen, University Medical Centre Groningen*

17  
18 Karina Meijer MD PhD

19  
20 *Amsterdam, Academic Medical Centre*

21  
22 Saskia Middeldorp MD, PhD

23  
24 Michiel Coppens MD, PhD

25  
26 Mandy N Lauw MD

27  
28 Y Whitney Cheung MD

29  
30 *Heerlen, Atrium Medical Centre*

31  
32 Guy JM Mostard MD

33  
34 Asiong Jie MD, PhD

35  
36 *Hoorn, Westfriesgasthuis*

37  
38 Simone M van den Heiligenberg MD

39  
40 *Eindhoven, Maxima Medical Centre*

41  
42 Lidwine W Tick MD, PhD

43  
44 Marten R Nijziel MD, PhD

45  
46 *Almere, Flevohospital*

47  
48 Marije ten Wolde MD, PhD

49  
50 Yuk W Cheung MD

51  
52 *Amsterdam, OLVG*

53  
54 Sanne van Wissen MD, PhD

55  
56 Wim E Terpstra MD, PhD

57  
58 *Roermond, Laurentius hospital*

59  
60 Marlène HW van de Poel MD

1  
2  
3 *Amsterdam, Slotervaart hospital*

4 Hans-Martin Otten MD, PhD

6 *Amsterdam, VU Medical Centre*

8 Erik H Serné MD, PhD

10 *Nijmegen, Radboud University Nijmegen Medical Centre*

12 Edith H Klappe MD, PhD

14 Mirian CH Janssen MD, PhD

16 Tjerk de Nijs MD

18 Italy:

19 *Padua, Aziende Ospedaliera di Padova*

21 Paolo Prandoni MD ,PhD

23 *Treviso, Aziende ULSS*

25 Sabina Villalta MD

## References

1. [www.rijksoverheid.nl](http://www.rijksoverheid.nl). Secondary [www.rijksoverheid.nl](http://www.rijksoverheid.nl).
2. Kahn SR, Shrier I, Julian JA, et al. Determinants and time course of the postthrombotic syndrome after acute deep venous thrombosis. *Ann Intern Med* 2008;**149**(10):698-707.
3. Pesavento R, Villalta S, Prandoni P. The postthrombotic syndrome. *Intern Emerg Med* 2010;**5**(3):185-92.
4. Prandoni P, Kahn SR. Post-thrombotic syndrome: prevalence, prognostication and need for progress. *Br J Haematol* 2009;**145**(3):286-95.
5. Prandoni P, Villalta S, Bagatella P, et al. The clinical course of deep-vein thrombosis. Prospective long-term follow-up of 528 symptomatic patients. *Haematologica* 1997;**82**(4):423-8.
6. Bergqvist D, Jendteg S, Johansen L, et al. Cost of long-term complications of deep venous thrombosis of the lower extremities: an analysis of a defined patient population in Sweden. *Ann Intern Med* 1997;**126**(6):454-7.
7. Brandjes DP, Buller HR, Heijboer H, et al. Randomised trial of effect of compression stockings in patients with symptomatic proximal-vein thrombosis. *Lancet* 1997;**349**(9054):759-62.
8. Prandoni P, Lensing AW, Prins MH, et al. Below-knee elastic compression stockings to prevent the post-thrombotic syndrome: a randomized, controlled trial. *Ann Intern Med* 2004;**141**(4):249-56.
9. Ten Cate-Hoek AJ, Ten Cate H, Tordoir J, et al. Individually tailored duration of elastic compression therapy in relation to incidence of the postthrombotic syndrome. *J Vasc Surg* 2010;**52**(1):132-8.
10. Ginsberg JS, Hirsh J, Julian J, et al. Prevention and treatment of postphlebotic syndrome: results of a 3-part study. *Arch Intern Med* 2001;**161**(17):2105-9.
11. Aschwanden M, Jeanneret C, Koller MT, et al. Effect of prolonged treatment with compression stockings to prevent post-thrombotic sequelae: a randomized controlled trial. *J Vasc Surg* 2008;**47**(5):1015-21.
12. Kahn SR, Shapiro S, Wells PS, et al. Compression stockings to prevent post-thrombotic syndrome: a randomised placebo-controlled trial. *Lancet* 2014;**383**(9920):880-8.
13. Aaronson NK, Muller M, Cohen PD, et al. Translation, validation, and norming of the Dutch language version of the SF-36 Health Survey in community and chronic disease populations. *J Clin Epidemiol* 1998;**51**(11):1055-68.
14. Brooks R. EuroQol: the current state of play. *Health Policy* 1996;**37**(1):53-72.
15. Kahn SR, Lamping DL, Ducruet T, et al. VEINES-QOL/Sym questionnaire was a reliable and valid disease-specific quality of life measure for deep venous thrombosis. *J Clin Epidemiol* 2006;**59**(10):1049-56.
16. Brouwer W. Handleiding voor het gebruik van PRODISQ versie 2.1 (PROductivity and DISease Questionnaire). Een modulaire vragenlijst over de relatie tussen ziekte en productiviteitskosten. Toepasbaar bij economische evaluaties van gezondheidszorgprogramma's voor patiënten en werknemers. Rotterdam/Maastricht 2004
17. Prandoni P, Lensing AW, Bernardi E, et al. The diagnostic value of compression ultrasonography in patients with suspected recurrent deep vein thrombosis. *Thromb Haemost* 2002;**88**(3):402-6.
18. Lancaster K. A new approach to consumer theory. *J Polit Econ* 1966(74):132-57.
19. CBO. *CBO Richtlijn Diagnostiek, preventie en behandeling van veneuze trombo-embolie en secundaire preventie van arteriele trombose*. Utrecht: Kwaliteitsinstituut voor de Gezondheidszorg CBO, 2008.

- 1
  - 2
  - 3
  - 4
  - 5
  - 6
  - 7
  - 8
  - 9
  - 10
  - 11
  - 12
  - 13
  - 14
  - 15
  - 16
  - 17
  - 18
  - 19
  - 20
  - 21
  - 22
  - 23
  - 24
  - 25
  - 26
  - 27
  - 28
  - 29
  - 30
  - 31
  - 32
  - 33
  - 34
  - 35
  - 36
  - 37
  - 38
  - 39
  - 40
  - 41
  - 42
  - 43
  - 44
  - 45
  - 46
  - 47
  - 48
  - 49
  - 50
  - 51
  - 52
  - 53
  - 54
  - 55
  - 56
  - 57
  - 58
  - 59
  - 60
20. Hirsh J, Guyatt G, Albers GW, et al. Antithrombotic and thrombolytic therapy: American College of Chest Physicians Evidence-Based Clinical Practice Guidelines (8th Edition). *Chest* 2008;**133**(6 Suppl):110S-12S.
21. Blattler W. Aspects of cost effectiveness in therapy of acute leg/pelvic vein thrombosis. *Wien Med Wochenschr* 1999;**149**(2-4):61-5.
22. Gelderblom GJ, Hagedoorn-Meuwissen EAV. Kousen uittrekhulpmiddel Easy-Lever. Een onderzoek naar bruikbaarheid, effecten en belemmeringen, in opdracht van ZonMw. 2005(juni).
23. Raju S, Hollis K, Neglen P. Use of compression stockings in chronic venous disease: patient compliance and efficacy. *Ann Vasc Surg* 2007;**21**(6):790-5.
24. Villalta S, Bagatella P, Picolli A, et al. Assessment of validity and reproducibility of a clinical scale for the post thrombotic syndrome. *Haemostasis* 1994(24):158a.
25. Kahn SR, Partsch H, Vedantham S, et al. Definition of post-thrombotic syndrome of the leg for use in clinical investigations: a recommendation for standardization. *J Thromb Haemost* 2009;**7**(5):879-83.
26. Weinstein MC, O'Brien B, Hornberger J, et al. Principles of good practice for decision analytic modeling in health-care evaluation: report of the ISPOR Task Force on Good Research Practices--Modeling Studies. *Value Health* 2003;**6**(1):9-17.
27. Ten Cate-Hoek AJ, Toll DB, Buller HR, et al. Cost-effectiveness of ruling out deep venous thrombosis in primary care versus care as usual. *J Thromb Haemost* 2009;**7**(12):2042-9.
28. Brazier J, Roberts J, Deverill M. The estimation of a preference-based measure of health from the SF-36. *Journal of health economics* 2002;**21**(2):271-92.
29. Dolan P. Modeling valuations for EuroQol health states. *Medical care* 1997;**35**(11):1095-108.
30. Blackwelder WC. "Proving the null hypothesis" in clinical trials. *Control Clin Trials* 1982;**3**(4):345-53.
31. Laster LL, Johnson MF. Non-inferiority trials: the 'at least as good as' criterion. *Stat Med* 2003;**22**(2):187-200.

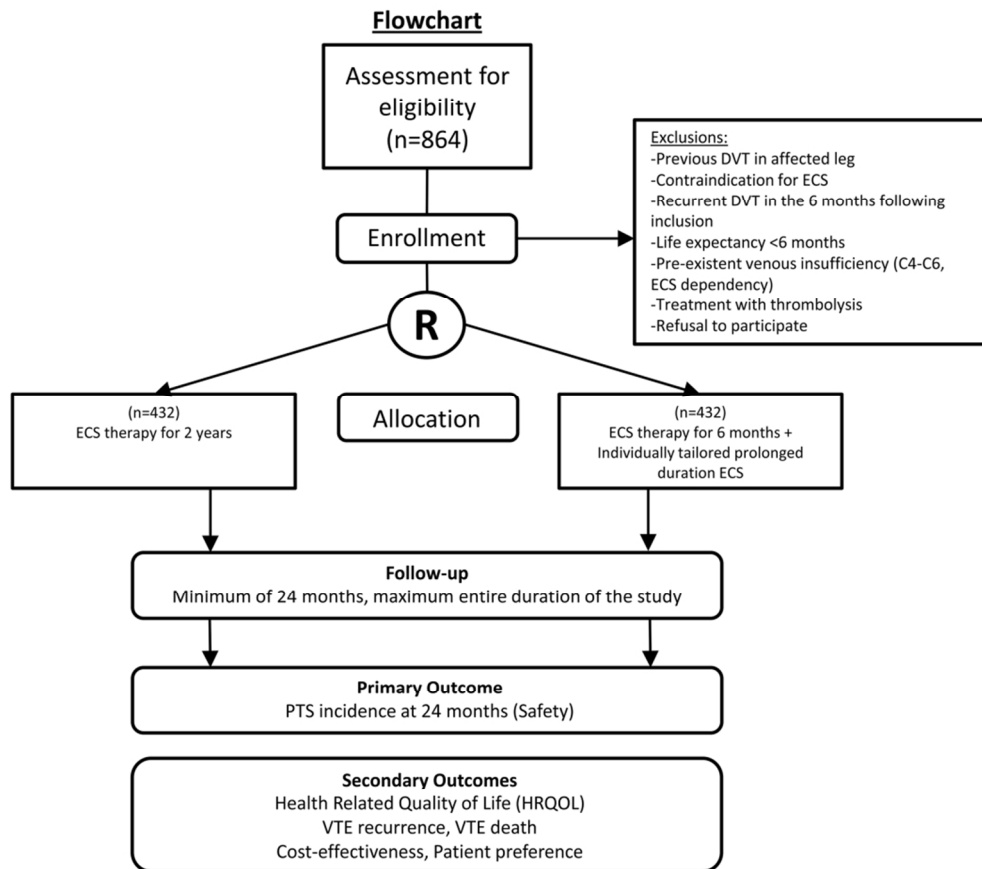

Figure 1. Study flow diagram  
90x79mm (300 x 300 DPI)

1  
2  
3  
4  
5  
6  
7  
8  
9  
10  
11  
12  
13  
14  
15  
16  
17  
18  
19  
20  
21  
22  
23  
24  
25  
26  
27  
28  
29  
30  
31  
32  
33  
34  
35  
36  
37  
38  
39  
40  
41  
42  
43  
44  
45  
46  
47  
48  
49  
50  
51  
52  
53  
54  
55  
56  
57  
58  
59  
60

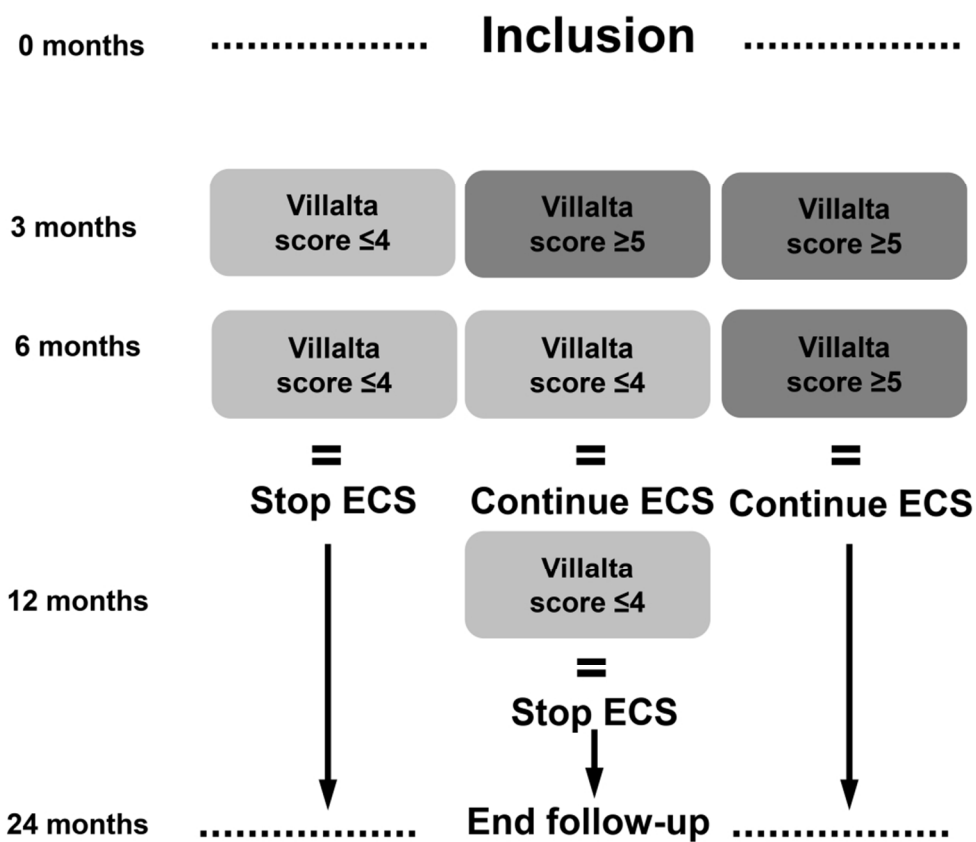

Figure 2. Algorithm individually tailored ECS therapy  
90x77mm (300 x 300 DPI)

# BMJ Open

**The IDEAL DVT study, individualized duration elastic compression therapy against long-term duration of therapy for the prevention of post thrombotic syndrome, a randomized controlled trial**

|                                 |                                                                                                                                                                                                                                                                                                                                                                                                                                                                                                                                                                                                                                                                                                                                                                                                                    |
|---------------------------------|--------------------------------------------------------------------------------------------------------------------------------------------------------------------------------------------------------------------------------------------------------------------------------------------------------------------------------------------------------------------------------------------------------------------------------------------------------------------------------------------------------------------------------------------------------------------------------------------------------------------------------------------------------------------------------------------------------------------------------------------------------------------------------------------------------------------|
| Journal:                        | <i>BMJ Open</i>                                                                                                                                                                                                                                                                                                                                                                                                                                                                                                                                                                                                                                                                                                                                                                                                    |
| Manuscript ID:                  | bmjopen-2014-005265.R2                                                                                                                                                                                                                                                                                                                                                                                                                                                                                                                                                                                                                                                                                                                                                                                             |
| Article Type:                   | Protocol                                                                                                                                                                                                                                                                                                                                                                                                                                                                                                                                                                                                                                                                                                                                                                                                           |
| Date Submitted by the Author:   | 10-Jul-2014                                                                                                                                                                                                                                                                                                                                                                                                                                                                                                                                                                                                                                                                                                                                                                                                        |
| Complete List of Authors:       | ten Cate, Arina; Maastricht University Medical Centre, Laboratory for Thrombosis and Hemostasis; Maastricht University Medical Center, Internal Medicine<br>Bouman, Annemieke; Maastricht University Medical Centre, Laboratory for Thrombosis and Hemostasis; Maastricht University Medical Center, Internal Medicine<br>Joore, Manuela; Maastricht University Medical Centre, Department of Clinical Epidemiology and Medical Technology Assessment (KEMTA)<br>Prins, Martin; Maastricht University Medical Center, Epidemiology; Maastricht University Medical Centre, Department of Clinical Epidemiology and Medical Technology Assessment (KEMTA)<br>ten Cate, Hugo; Maastricht University Medical Center, Internal Medicine; Maastricht University Medical Centre, Laboratory for Thrombosis and Hemostasis |
| <b>Primary Subject Heading</b>: | Cardiovascular medicine                                                                                                                                                                                                                                                                                                                                                                                                                                                                                                                                                                                                                                                                                                                                                                                            |
| Secondary Subject Heading:      | Haematology (incl blood transfusion), Health economics                                                                                                                                                                                                                                                                                                                                                                                                                                                                                                                                                                                                                                                                                                                                                             |
| Keywords:                       | Post thrombotic syndrome, Deep vein thrombosis, Elastic compression stocking therapy, Protocol, RCT                                                                                                                                                                                                                                                                                                                                                                                                                                                                                                                                                                                                                                                                                                                |
|                                 |                                                                                                                                                                                                                                                                                                                                                                                                                                                                                                                                                                                                                                                                                                                                                                                                                    |

SCHOLARONE™  
Manuscripts



1  
2  
3 Study Protocol

4 The IDEAL DVT study, individualized duration elastic compression therapy against long-term duration  
5 of therapy for the prevention of post thrombotic syndrome, a randomized controlled trial  
6  
7  
8  
9

10  
11  
12  
13  
14  
15 Authors: Arina J ten Cate-Hoek<sup>1,2</sup>, Annemieke C Bouman<sup>1,2</sup>, Manuela Joore<sup>3</sup>, Martin Prins<sup>3,4</sup>, Hugo  
16 ten Cate<sup>1,2</sup>, for the IDEAL DVT trial investigators.  
17  
18

19  
20  
21 Corresponding author: Arina J ten Cate-Hoek MD, PhD.

22  
23 Address: P Debyelaan 25

24  
25 6229 HX Maastricht

26  
27 E-mail: [arina.tencate@maastrichtuniversity.nl](mailto:arina.tencate@maastrichtuniversity.nl)

28  
29 Telephone number: 0031(0)43-3871243

30  
31 Fax number: 0031(0)43-3876096  
32  
33

34 <sup>1</sup>Laboratory for Thrombosis and Hemostasis, Maastricht University Medical Centre, Maastricht, the  
35 Netherlands  
36

37  
38 <sup>2</sup>Department of Internal Medicine, Maastricht University Medical Centre, Maastricht, the Netherlands

39  
40 <sup>3</sup>Department of Clinical Epidemiology and Medical Technology Assessment (KEMTA), Maastricht  
41 University Medical Center, Maastricht, The Netherlands  
42

43  
44 <sup>4</sup>Department of Epidemiology, Care and Public Health Research Institutes, Maastricht University,  
45 Maastricht, the Netherlands  
46  
47

48  
49 Key words: Post thrombotic syndrome, deep vein thrombosis, elastic compression stocking therapy,  
50 protocol, RCT  
51

52  
53 Word count: 3345  
54  
55  
56  
57  
58  
59  
60

**Abstract****Introduction:**

Post thrombotic syndrome (PTS) is a serious complication of deep vein thrombosis (DVT) of the leg that affects 20-50% of patients. Once a patient experiences PTS there is no treatment that effectively reduces the debilitating complaints. Two randomized controlled trials showed that elastic compression stocking (ECS) therapy after DVT for 24 months can reduce the incidence of PTS by 50%. However, it is unclear whether all patients benefit to the same extent from ECS therapy or what the optimal duration of therapy for individual patients should be. ECS therapy is costly, inconvenient, demanding and sometimes even debilitating. Tailoring therapy to individual needs could save substantial costs. The objective of the IDEAL DVT study therefore is to evaluate whether tailoring the duration of ECS therapy on signs and symptoms of the individual patient is a safe and effective method to prevent PTS, compared to standard ECS therapy.

**Methods and analysis:**

A multicentre, single-blinded, allocation concealed, randomized, non-inferiority trial. A total of 864 consecutive patients with acute objectively documented proximal DVT of the leg are randomized to either standard duration of 24 months or tailored duration of ECS therapy following an initial therapeutic period of 6 months. Signs and symptoms of PTS are recorded at regular clinic visits. Furthermore, quality of life, costs, patient preferences and compliance are measured. The primary outcome is the proportion of patients with PTS at 24 months.

**Ethics and dissemination:**

Based on current knowledge the standard application of ECS therapy is questioned. The IDEAL DVT study will address the central questions that remain unanswered: What individual patients do benefit from ECS therapy and what is the optimal individual treatment duration? Primary ethics approval was received from the Maastricht University Medical Centre.

Results of the study will be disseminated via peer-reviewed publications and presentations at scientific conferences.

**Trial Registration number:**

NCT01429714 and NTR 2597

## Background

After deep vein thrombosis (DVT) 20-50% of patients develop post thrombotic syndrome (PTS). PTS is a chronic condition, characterized by leg complaints such as pain; heaviness; cramps; aching; tingling; and leg signs due to venous insufficiency, evolving in severe cases to venous ulceration of the leg that was affected by the DVT.<sup>1-5</sup> PTS is a serious affliction, with substantial impact on quality of life and costs.<sup>2,6</sup> Because an effective therapy is lacking, prevention of PTS is of major importance. Up till now, elastic compression stocking (ECS) therapy after DVT has been the mainstay of PTS prevention. The evidence sustaining the value of ECS therapy following acute DVT is derived from 2 randomized clinical trials, which showed that incidences of PTS were reduced by approximately 50%, with application of ECS therapy for 24 months.<sup>7,8</sup> However, based on these trials it is still undecided whether all patients benefit to the same extent from ECS therapy or what the optimal duration of ECS therapy for individual patients should be. We have previously assessed the safety of shortened duration of ECS therapy based on individual patient clinical scores in a management study of 125 patients, and we have shown that tailoring the duration of ECS therapy based on the signs and symptoms of the individual patient after an initial treatment period of 6 months, is a safe strategy to prevent PTS. We found that 50% of our patients did not need ECS therapy for as long as 2 years, while the overall incidence of PTS was 21.1% (95% CI 13.5- 28.7).<sup>9</sup> This incidence is comparable to published incidences after 24 months ECS therapy.<sup>7,8</sup> While this was a prospective management cohort study with an open character and therefore prone to bias, the results of this study need to be confirmed by an adequately powered randomized controlled trial.

There have been other studies that highlighted different aspects of ECS therapy. ECS therapy may not be indicated for all patients as shown by a study that assessed whether ECS therapy initiated one year after the event of DVT would lower the incidence of PTS in patients without complaints but with reflux on duplex testing. No significant benefit of ECS therapy at this late time of onset was found. The incidence of PTS was low in both groups.<sup>10</sup> One study so far assessed whether prolonged duration of ECS therapy was superior to 6 months of ECS therapy following an event of proximal DVT. In this study no significant difference in the incidence of PTS according to the CEAP classification was observed between the two treatment groups.<sup>11</sup>

1  
2  
3 The proposed IDEAL (individually tailored elastic compression against (=versus) longterm therapy)  
4 DVT study is a non-inferiority trial and aims to demonstrate that the assessed alternative therapy  
5 based on ECS for 6 months followed by individually prolonged ECS therapy based on Villalta scores is  
6 non-inferior to the comparator ECS therapy for a standard duration of 24 months. In addition we are  
7 interested to study the cost-effectiveness of individual tailoring of the duration of ECS therapy via a  
8 cost-utility analysis (CUA) and we want to retrieve information on the patient's motivations for  
9 compliance or non-compliance to therapy. Because compliance to therapy is one of the most  
10 important prerequisites for successful ECS therapy, a discrete choice experiment (DCE) will be  
11 performed in which patient preferences towards ECS therapy will be assessed, in order to reveal the  
12 main obstacles for compliance to therapy. For this purpose, a DCE questionnaire will be send to a  
13 subset of the population (300 patients) at approximately 3 months after DVT.

14  
15 The results of a recently published placebo controlled trial performed by Kahn et al. refuted the routine  
16 wearing of ECS after DVT altogether.<sup>12</sup> This study showed no treatment effect at all from ECS therapy  
17 in contrast to the large treatment effects found in previous non-placebo controlled trials.<sup>7 8</sup> The  
18 unexpected lack of effectiveness cannot be dismissed solely as a placebo effect. The compliance to  
19 ECS therapy, a major determinant of effectiveness, was 55.6% after 24 months. This was less in  
20 comparison to the previous trials by Brandjes and Prandoni, where compliance was up to 90%.<sup>7 8 12</sup>  
21 Although a per protocol analysis of the patients reporting regular stocking use yielded the same  
22 outcome, this sub analysis may not be adequately powered to dismiss lack of compliance as an  
23 important determinant of non-effectiveness.

24  
25 Based on current knowledge it is therefore understood that the standard application of ECS therapy is  
26 questioned. Especially the benefit to individual patients and the optimal duration of ECS therapy were  
27 never studied properly and as a result it is unclear which individual patients require therapy and for  
28 how long.

29  
30 The IDEAL DVT study aims to address these topics. In addition quality of life, patient preference  
31 towards ECS therapy, compliance to therapy, as well as cost-effectiveness of ECS therapy will be  
32 assessed.

33  
34 The primary outcome of the IDEAL DVT study will be PTS at 24 months after the event. The  
35 secondary outcomes will be: 1. Health Related Quality Of Life, measured by questionnaires (SF-36<sup>13</sup>,  
36 EuroQOL-5D<sup>14</sup>, Dutch translated Veines-Qol<sup>15</sup>, 2. Costs<sup>16</sup>), 3. Recurrent thrombosis, according to  
37  
38  
39  
40  
41  
42  
43  
44  
45  
46  
47  
48  
49  
50  
51  
52  
53  
54  
55  
56  
57  
58  
59  
60

1  
2  
3 criteria as published<sup>17</sup> and assessed by objective tests, 4. VTE related death during follow-up,  
4 assessed by an independent and blinded adjudication committee, 5. Patient preferences, assessed  
5 with a Discrete Choice Experiment (DCE)<sup>18</sup>.  
6  
7  
8  
9

10 The scope of the problem in the Netherlands

11  
12 In the Netherlands, each year around 25.000 patients experience a new event of DVT. In order to  
13 prevent PTS, common practice is to prescribe custom fitted ECS therapy for 2 years for all patients.<sup>19</sup>

14  
15 <sup>20</sup> ECS therapy is costly, demanding and sometimes even debilitating. Elderly patients can often not  
16 apply the ECS by themselves but need help from family or they even need home care visits (7.5%).<sup>21-</sup>  
17

18  
19 <sup>23</sup> Total annual costs of ECS therapy roughly amounts to 2.5 million euro for stockings (25.000  
20 patients\*100 euro) and 21 million euro for home care (7.5%\*25.000 patients\*500 visits\*20 euro).<sup>21-23</sup>  
21  
22

23 Moreover, the majority of patients do not experience any post thrombotic complaints.<sup>10</sup> In the  
24 Netherlands, over 10 million euro each year could be saved if ECS treatment would be individualized.  
25  
26  
27

## 28 **Methods/Design**

29  
30 A multicentre, single-blinded, allocation concealed, randomized, non-inferiority trial comparing  
31 individually tailored duration of ECS therapy (intervention) with standard duration of 24 months ECS  
32 therapy (control), for the prevention of PTS. Randomization will guarantee a balanced distribution of  
33 patients within each patient group. Stratification will be performed on centre and potentially  
34 confounding effects such as age, sex and body mass index. The study will be a multicenter study in  
35 order to get a good representation of patients and to achieve sufficient patient numbers. The primary  
36 outcome will be PTS at 24 months after the event; the observers will be blinded to the allocated  
37 treatment arm. The allocation will be concealed from study personnel involved in assessing the leg  
38 symptoms and rating the PTS scores. Both randomization and allocation concealment are used as  
39 strategies against bias. The study is not double blinded; no inactive stockings will be used in the  
40 comparator group. The use of sham stockings will very likely interfere with the quality of life and will  
41 complicate the assessment of perceived differences between groups. Patients will be followed for the  
42 entire study duration; incidence of recurrent DVT and VTE related death during the follow-up period  
43 will be documented.  
44  
45  
46  
47  
48  
49  
50  
51  
52  
53  
54  
55  
56  
57  
58  
59  
60

## Patients and treatment

Consecutive, consenting adults with an acute objectively documented proximal DVT of the leg, adequately treated with anticoagulant treatment and initial compression therapy according to a prespecified protocol are included in the study. Patients are included and randomized in the IDEAL DVT study within 2-6 weeks after DVT.

### Exclusion criteria are:

- Previous DVT in the affected leg. Patients with a previous ipsilateral DVT might already have developed PTS after the first DVT.
- Recurrent DVT in the 6 months following inclusion, as it cannot be justified to advise these patients to discontinue ECS therapy 6 months after DVT.
- Pre-existent venous insufficiency (skin signs C3-C6 on CEAP score or requiring ECS therapy). Pre-existent venous insufficiency increases the risk of developing PTS and the majority of patients with venous insufficiency already chronically wear elastic compression stockings. In addition venous insufficiency is closely related to PTS and is therefore difficult to differentiate from PTS.
- Contraindication for ECS therapy such as intermittent claudication or clinical signs of leg ischemia or asymptomatic arterial insufficiency (a pulse deficit or bruit at sites of narrowing at physical examination).
- Active thrombolysis, as thrombolysis reduces the risk of PTS.
- Limited life expectancy (< 6 months), as the follow-up period is 2 years.

Patients are recruited from 12 hospitals in the Netherlands and 2 hospitals in Italy.

There is a prespecified protocol for the management of DVT in all participating centres.

In the initial acute phase after DVT, until the acute oedema has disappeared, one of three strategies will be applied. The leg is either bandaged with short stretch bandages to a compression of 30-40 mmHg, worn day and night and redressed twice per week; or a bandage stocking with 35mmHg compression is prescribed (Mediven Struva 35<sup>®</sup>, Medi, Breda, the Netherlands), worn day and night; or no initial compression therapy is applied, according to the prespecified strategy of the hospital protocol. After the initial phase, a custom fitted, flat knitted, knee length graduated elastic compression stocking class III (ankle pressure 40 mmHg) is prescribed for all patients. The same brand and type (Mediven 550) of compression stocking is prescribed to all patients in all participating centres.

1  
2  
3 Compression therapy with the elastic compression stocking is started immediately after the initial  
4 phase, so there is no period without compression in between, with exception of the patients who do  
5 not receive compression in the initial phase. Patients receive two new stockings every year. Patients  
6 are advised to wear the stockings during the daytime.  
7  
8  
9

#### 10 11 12 Procedures

13  
14 After obtaining written informed consent, randomization is performed centrally at the coordinating  
15 study centre, the Maastricht University Medical centre. Patients are included and randomized within 2-  
16 6 weeks after diagnosis of DVT. Patients are randomized to one of the two treatment arms. (Figure 1)  
17  
18 A web-based randomisation program (TENALEA (Trans European Network for Clinical Trials  
19 Services)) is used that executes blocked randomisation with stratification on centre-level and on  
20 possible confounding patient characteristics such as age, sex, and Body Mass Index ( $<26 \text{ kg/m}^2$  -  $\geq 26$   
21  $\text{kg/m}^2$ ). Permuted blocks of randomly varying size are used to maintain balance of numbers in each  
22 treatment group and to ensure allocation concealment.  
23  
24  
25  
26  
27

28  
29 Information on allocation is only accessible to the study personnel at the coordinating study centre in  
30 Maastricht, and patients will receive information about their allocation via the coordinating study  
31 centre. The allocation will be concealed from study personnel involved in assessing the leg symptoms  
32 and rating the PTS scores. Patients are not blinded by the use of sham stockings, because they may  
33 influence quality of life, complicating the assessment of perceived differences between groups.  
34  
35 Patients are asked not to reveal their treatment allocation to their own physician, and not to wear the  
36 elastic compression stocking at the day of their outpatient clinic visits.  
37  
38  
39  
40  
41  
42

43  
44 All patients are advised to wear the elastic compression stocking during the first 6 months after DVT.  
45 In the control group, all patients are instructed to wear the elastic compression stocking daily for a total  
46 duration of 2 years. In the Intervention group, duration of ECS therapy is individually tailored based on  
47 Villalta scores.<sup>24</sup> After the first 6 months therefore, there are three scenarios:  
48  
49  
50

- 51 (1) The Villalta score at both the 3 and 6-month follow-up visit is  $\leq 4$ . Then the patient is advised  
52 to discontinue ECS therapy.  
53
- 54 (2) The Villalta score at the 3-month follow-up visit is  $\geq 5$  the Villalta score at the 6 month follow-  
55 up visit is  $\leq 4$ . The patient is advised to continue the ECS therapy for another 6 months. If the  
56  
57  
58  
59  
60

1  
2  
3 Villalta score at the 12 month follow-up visit is  $\leq 4$ , the patient is allowed to discontinue the  
4  
5 ECS therapy,

- 6  
7 (3) The Villalta score is  $\geq 5$  at both the 3 and 6 months follow-up visit. The patient is advised to  
8  
9 continue the ECS therapy for a total duration of 24 months. (Figure 2)

10  
11  
12 Using this algorithm the duration of ECS therapy is individually tailored in each patient. The decision  
13  
14 on the duration of ECS therapy in patients in the intervention group is made centrally at the  
15  
16 coordinating study centre, as only there the information on treatment allocation is available. The  
17  
18 patient is informed about the decisions on the (dis) continuation of the ECS therapy by the  
19  
20 coordinating centre.

21  
22 When a patient develops symptoms and signs of PTS after discontinuation of ECS therapy, a  
23  
24 predefined protocol is followed. If necessary, ECS treatment will be reinstated.

#### 25 26 27 Follow-up

28  
29 All patients are followed for 24 months after DVT. During these 24 months they visit the outpatient  
30  
31 clinic 4 times: at 3, 6, 12, and 24 months after the DVT. At each follow-up visit the signs of PTS will be  
32  
33 recorded and scored, by the study nurse or the treating physician, using the objective part of the  
34  
35 Villalta clinical scale for PTS.<sup>24</sup> In case of intermittent leg complaints or signs or symptoms suspect of  
36  
37 recurrent VTE, patients are instructed to visit their treating physician. Study documentation will be  
38  
39 filled out and adverse events will be recorded. The CCMO (central committee human related research)  
40  
41 will be notified in case of serious adverse events or death.

42  
43 The patient is asked to fill out 5 questionnaires: at baseline, and 3, 6, 12 and 24 months later. All  
44  
45 questionnaires will be offered as a web based application, each patient will have a unique personal  
46  
47 entry code. For patients who are not able or willing to use the electronic questionnaires, a paper  
48  
49 version will be available. The first questionnaire is filled out shortly after inclusion (4-6 weeks after  
50  
51 DVT) and the subsequent questionnaires are filled out the day before each follow-up visit. All  
52  
53 questionnaires contain the subjective part of the Villalta clinical scale for PTS<sup>24</sup>, questions on ECS  
54  
55 compliance, a cost questionnaire<sup>16</sup>, and three health related quality of life (HRQOL) questionnaires:  
56  
57 the Dutch translated Veines-Qol<sup>15</sup>, the SF-36<sup>13</sup>, and the EuroQOL-5D<sup>14</sup>. In a subset of the study  
58  
59 population patient preferences regarding elastic compression therapy will be analysed, by conducting  
60



1  
2  
3 a discrete choice experiment (DCE). For this purpose, a DCE questionnaire will be send to a subset of  
4 the population at approximately 3 months after DVT.  
5  
6

7 Compliance to ECS therapy is monitored in two ways. Each questionnaire contains a question on  
8 compliance to the advised version of ECS therapy. Because compliance and adherence to therapy is  
9 of crucial importance the number of contact moments for the assessment of compliance with ECS  
10 therapy will be increased by adding telephone contacts to the regular clinical visits. Study-supporting  
11 staff will make computer-assisted random telephone calls during the entire follow-up period to both the  
12 patients in the group with the 2-year ECS intervention and to patients in the group with individualized  
13 ECS therapy. The telephone calls will be made randomly to create a surprise effect (patients are off  
14 guard) and to allow for a distribution of contacts over the entire study period. Per patient 3 extra  
15 contact moments will be created. A standard questionnaire will be used to assess compliance and to  
16 address reasons for non-compliance. Crossover to another therapy arm will be discussed and  
17 discouraged.  
18  
19  
20  
21  
22  
23  
24  
25  
26  
27  
28

### 29 Outcomes

30  
31 The primary outcome is the proportion of patients with PTS at the end of follow-up, 24 months after  
32 DVT. PTS is defined as a Villalta score of  $\geq 5$  at two consecutive visits that are at least three months  
33 apart. The time point of the second Villalta score of  $\geq 5$  will be considered the time point of PTS  
34 diagnosis. Although the consensus is to diagnose PTS at the 6-month visit or later based on one  
35 single Villalta score  $\geq 5$ <sup>25</sup>, we modelled this study after the preceding management study in which two  
36 consecutive Villalta scores  $\geq 5$  were needed for the diagnosis PTS. We observed that a proportion of  
37 patients (about 12%) had fluctuating Villalta scores beyond 6 months after the acute event of DVT.<sup>9</sup>  
38 Assigning the diagnosis based on one single score  $\geq 5$  would therefore lead to misclassification and  
39 overestimation of the PTS incidence. The Villalta scores at 6 months will be available; therefore also  
40 the proportion of patients with PTS according to the consensus scoring method will be presented.  
41  
42  
43  
44  
45  
46  
47  
48  
49  
50

51 Secondary outcomes include:

52  
53 1. HRQOL, measured by questionnaires (SF-36<sup>13</sup>, EuroQOL-5D<sup>14</sup>, Dutch translated Veines-Qol<sup>15</sup>), 2.  
54 Costs<sup>16</sup>, 3. Recurrent thrombosis, according to criteria as published<sup>17</sup> and assessed by objective  
55  
56  
57  
58  
59  
60

1  
2  
3 tests, 4. VTE related death during follow-up, assessed by an independent and blinded adjudication  
4 committee, 5. Patient preferences, assessed with a Discrete Choice Experiment (DCE)<sup>18</sup>.  
5  
6  
7

8 Since both effects on costs and generic health-related quality of life are to be expected, the method of  
9 economic evaluation is a cost-utility analysis (CUA). The analysis will be from a societal perspective.  
10 The primary effect parameter is generic health-related quality of life, measured in quality adjusted life  
11 years (QALYs). We will perform two analyses: a trial based CUA with a time horizon of two years  
12 (identical to the duration of follow up in the clinical study), and a model-based CUA with a lifelong time  
13 horizon. For the latter, we will follow the guidelines of good modelling.<sup>26</sup> We will be able to adapt a  
14 Markov model for diagnostic strategies in DVT, which was developed by our group earlier.<sup>27</sup> Costs in  
15 the economic analyses include direct health care costs (medical costs for prevention, diagnostics,  
16 therapy, rehabilitation and care), direct non-health care costs (travel costs) and indirect costs  
17 (productivity loss). Utilities will be calculated from the responses on the EQ-5D and SF36 classification  
18 systems using the available multi-attribute utility functions.<sup>28 29</sup> Incremental cost-utility ratios will be  
19 calculated, and non-parametric bootstrap analyses will be used to quantify the uncertainty surrounding  
20 the cost-utility ratio of the trial-based analysis. Sensitivity analyses and subgroup analyses will be  
21 performed, to assess the impact of variation in parameters and heterogeneity of the patient population.  
22 ECS therapy has several disadvantages for the patients (stockings are uncomfortable, ugly, and  
23 difficult to put on and off), while duration and effectiveness are uncertain. A DCE will be conducted to  
24 assess the patient preferences regarding ECS therapy, providing insight in the trade-offs patients  
25 make between characteristics of the therapy when deciding to wear the stocking or not. Duration of  
26 ECS therapy is one of the characteristics. Data will be analysed using multinomial logit models and  
27 mixed logit models. (Nlogit, Econometric Software)  
28  
29  
30  
31  
32  
33  
34  
35  
36  
37  
38  
39  
40  
41  
42  
43  
44  
45  
46

#### 47 Sample size calculation

48 The proposed study is a non-inferiority trial and aims to demonstrate that the assessed alternative  
49 therapy based on ECS for 6 months followed by individually prolonged ECS therapy based on Villalta  
50 scores is not worse than the comparator ECS therapy for a standard duration of 24 months, by more  
51 than the prespecified amount of 7.5% (the non-inferiority margin). The published incidence of PTS  
52 following two years of ECS lies between 20 and 30%. (Prandoni 24.5% (95% CI 15.6- 33.4), Brandjes  
53  
54  
55  
56  
57  
58  
59  
60

1  
2  
3 20% (95% CI 12.4-29.2)<sup>7 8</sup> As it is statistically impossible to demonstrate equivalence (prove the H0 of  
4 no difference), Blackwelder proposed a one sided significance test to reject the null hypothesis by a  
5 clinically acceptable amount.<sup>30</sup> If we allow a difference of 7.5% in the outcome PTS between the group  
6 with ECS for 2 years and the group with the alternative therapy, 70% of the effect will be preserved.  
7  
8 This proportion of loss in efficacy is customarily accepted in controlled randomized clinical trials. At a  
9  
10 one sided significance level of 0.05 and a power of 80%, with a ratio of 1, a total of 847 patients is  
11  
12 needed to provide sufficient patients for an adequately powered trial.<sup>30 31</sup> Loss to follow-up of patients  
13  
14 is expected to be less than 2% since the intervention does not have an invasive nature. Therefore, a  
15  
16 total of 864 patients are needed (432 patients per treatment arm).  
17  
18  
19  
20

### 21 Statistical analysis

22  
23 Descriptive statistics of the total population and of the two treatment groups separately will be  
24  
25 computed to provide baseline characteristics of the patients in both treatment arms.

26  
27 For the primary outcome PTS, univariate analysis of all proportions will be performed with logistic  
28  
29 regression (chi-squared) analysis. Kaplan-Meier method will be used to calculate the cumulative  
30  
31 incidences of PTS, adjusted for centre, to compare incidence rates between the two treatment arms.  
32  
33 Patients who die or are lost to follow-up will be censored at their last visit. ANOVA will be applied to  
34  
35 assess changes over time, by comparing different outcome measures at the different time points of  
36  
37 follow-up.

38  
39 Hazard ratio's and 95% confidence intervals for both treatment arms will be calculated using Cox  
40  
41 regression models. Hazard ratio's will be stratified for centre and adjusted for age, sex, BMI, clinical  
42  
43 presentation of DVT, and extent of the index deep vein thrombosis.  
44

### 45 Interim analysis (safety)

46  
47 A prespecified safety analysis will be performed when 50% of the subjects have completed the 2-year  
48  
49 follow-up. The analysis will be performed by the coordinating centre, and supervised by the principal  
50  
51 investigators. The safety analysis will be performed to assess significant enhanced risk of PTS or  
52  
53 excess morbidity/mortality in the intervention arm of the study population. Fisher's exact test will be  
54  
55 performed to compare incidence of PTS at a significance level of 0.05 (two sided). The study can  
56  
57 be stopped in case of significant excess morbidity/mortality in the alternative treatment arm.  
58  
59  
60

## Ethical considerations

The medical ethical committees of all participating hospitals in the Netherlands and Italy approved this study. All patients are extensively informed about the study, and written informed consent is obtained from all participating patients.

The IDEAL DVT study started including patients at 11<sup>th</sup> of March 2011 and inclusion is currently ongoing. Recruitment is expected to be terminated in January 2015. As the follow-up is 2 years, the results are expected within 3 years, in January 2017.

## Discussion

Based on current knowledge the standard application of ECS therapy after DVT is questioned. The definitive answer on the usefulness of ECS therapy for the prevention of PTS is not yet provided. Therefore the need for the IDEAL DVT study remains unchanged. The benefit to individual patients and the optimal duration of ECS therapy were never studied properly and as a result it is unclear which individual patients require therapy and for how long. The IDEAL DVT study will address the central questions that remain unanswered: What individual patients do benefit from ECS therapy and what is the optimal individual treatment duration? The study that we plan to perform is not only innovative; for the first time individual tailoring of duration of ECS therapy will be investigated, but also it will provide unique additional knowledge on the safety, effectiveness and cost-effectiveness of this approach.

**Trial status**

The IDEAL DVT study is currently in progress. Patient recruitment started March 15th 2011 and is still on-going.

**Acknowledgments**

The IDEAL DVT trial is funded by a grant from Zon-mW the Netherlands. ( 171102007)

We especially acknowledge the participating investigators.

**Competing interests**

The authors declare that they have no competing interests.

**Funding**

This work was supported by Zon-mW the Netherlands grant number 171102007.

**Contributions**

AtC wrote the protocol and designed the study, the other authors MJ (cost-effectiveness research), MP (study design/statistics) and HtC (study design) contributed. AB is a PhD student and coordinator of the trial.

**Ethics approval**

Maastricht University Medical Centre.

1  
2  
3 The IDEAL DVT investigators:

4 The Netherlands:

5  
6 *Maastricht, Maastricht University Medical Centre*

7  
8 Arina J ten Cate-Hoek MD, PhD (principal investigator)

9  
10 Hugo ten Cate MD, PhD

11  
12 Manuela Joore PhD

13  
14 Annemieke C Bouman MD

15  
16 *Groningen, University Medical Centre Groningen*

17  
18 Karina Meijer MD PhD

19  
20 *Amsterdam, Academic Medical Centre*

21  
22 Saskia Middeldorp MD, PhD

23  
24 Michiel Coppens MD, PhD

25  
26 Mandy N Lauw MD

27  
28 Y Whitney Cheung MD

29  
30 *Heerlen, Atrium Medical Centre*

31  
32 Guy JM Mostard MD

33  
34 Asiong Jie MD PhD

35  
36 *Hoorn, Westfriesgasthuis*

37  
38 Simone M van den Heiligenberg MD

39  
40 *Eindhoven, Maxima Medical Centre*

41  
42 Lidwine W Tick MD, PhD

43  
44 Marten R Nijziel MD, PhD

45  
46 *Almere, Flevohospital*

47  
48 Marije ten Wolde MD, PhD

49  
50 Y Whitney Cheung MD

51  
52 *Amsterdam, OLVG*

53  
54 Sanne van Wissen MD, PhD

55  
56 Wim E Terpstra MD, PhD

57  
58 *Roermond, Laurentius hospital*

59  
60 Marlène HW van de Poel MD

1  
2  
3 *Amsterdam, Slotervaart hospital*

4 Hans-Martin Otten MD, PhD

6 *Amsterdam, VU Medical Centre*

8 Erik H Serné MD, PhD

10 *Nijmegen, Radboud University Nijmegen Medical Centre*

12 Edith H Klappe MD, PhD

14 Mirian CH Janssen MD, PhD

16 Tjerk de Nijs MD

18 Italy:

19 *Padua, Aziende Ospedaliera di Padova*

21 Paolo Prandoni MD, PhD

23 *Treviso, Aziende ULSS*

25 Sabina Villalta MD

26  
27  
28  
29  
30 **FIGURE LEGENDS**

32 Figure 1. Study flow diagram

34 Figure 2. Algorithm individually tailored ECS therapy

## References

1. [www.rijksoverheid.nl](http://www.rijksoverheid.nl). Secondary [www.rijksoverheid.nl](http://www.rijksoverheid.nl).
2. Kahn SR, Shrier I, Julian JA, et al. Determinants and time course of the postthrombotic syndrome after acute deep venous thrombosis. *Ann Intern Med* 2008;**149**(10):698-707.
3. Pesavento R, Villalta S, Prandoni P. The postthrombotic syndrome. *Intern Emerg Med* 2010;**5**(3):185-92.
4. Prandoni P, Kahn SR. Post-thrombotic syndrome: prevalence, prognostication and need for progress. *Br J Haematol* 2009;**145**(3):286-95.
5. Prandoni P, Villalta S, Bagatella P, et al. The clinical course of deep-vein thrombosis. Prospective long-term follow-up of 528 symptomatic patients. *Haematologica* 1997;**82**(4):423-8.
6. Bergqvist D, Jendteg S, Johansen L, et al. Cost of long-term complications of deep venous thrombosis of the lower extremities: an analysis of a defined patient population in Sweden. *Ann Intern Med* 1997;**126**(6):454-7.
7. Brandjes DP, Buller HR, Heijboer H, et al. Randomised trial of effect of compression stockings in patients with symptomatic proximal-vein thrombosis. *Lancet* 1997;**349**(9054):759-62.
8. Prandoni P, Lensing AW, Prins MH, et al. Below-knee elastic compression stockings to prevent the post-thrombotic syndrome: a randomized, controlled trial. *Ann Intern Med* 2004;**141**(4):249-56.
9. Ten Cate-Hoek AJ, Ten Cate H, Tordoir J, et al. Individually tailored duration of elastic compression therapy in relation to incidence of the postthrombotic syndrome. *J Vasc Surg* 2010;**52**(1):132-8.
10. Ginsberg JS, Hirsh J, Julian J, et al. Prevention and treatment of postphlebotic syndrome: results of a 3-part study. *Arch Intern Med* 2001;**161**(17):2105-9.
11. Aschwanden M, Jeanneret C, Koller MT, et al. Effect of prolonged treatment with compression stockings to prevent post-thrombotic sequelae: a randomized controlled trial. *J Vasc Surg* 2008;**47**(5):1015-21.
12. Kahn SR, Shapiro S, Wells PS, et al. Compression stockings to prevent post-thrombotic syndrome: a randomised placebo-controlled trial. *Lancet* 2014;**383**(9920):880-8.
13. Aaronson NK, Muller M, Cohen PD, et al. Translation, validation, and norming of the Dutch language version of the SF-36 Health Survey in community and chronic disease populations. *J Clin Epidemiol* 1998;**51**(11):1055-68.
14. Brooks R. EuroQol: the current state of play. *Health Policy* 1996;**37**(1):53-72.
15. Kahn SR, Lamping DL, Ducruet T, et al. VEINES-QOL/Sym questionnaire was a reliable and valid disease-specific quality of life measure for deep venous thrombosis. *J Clin Epidemiol* 2006;**59**(10):1049-56.
16. Brouwer W. Handleiding voor het gebruik van PRODISQ versie 2.1 (PROductivity and DISease Questionnaire). Een modulaire vragenlijst over de relatie tussen ziekte en productiviteitskosten. Toepasbaar bij economische evaluaties van gezondheidszorgprogramma's voor patiënten en werknemers. Rotterdam/Maastricht 2004
17. Prandoni P, Lensing AW, Bernardi E, et al. The diagnostic value of compression ultrasonography in patients with suspected recurrent deep vein thrombosis. *Thromb Haemost* 2002;**88**(3):402-6.
18. Lancaster K. A new approach to consumer theory. *J Polit Econ* 1966(74):132-57.
19. CBO. *CBO Richtlijn Diagnostiek, preventie en behandeling van veneuze trombo-embolie en secundaire preventie van arteriele trombose*. Utrecht: Kwaliteitsinstituut voor de Gezondheidszorg CBO, 2008.



- 1
  - 2
  - 3
  - 4
  - 5
  - 6
  - 7
  - 8
  - 9
  - 10
  - 11
  - 12
  - 13
  - 14
  - 15
  - 16
  - 17
  - 18
  - 19
  - 20
  - 21
  - 22
  - 23
  - 24
  - 25
  - 26
  - 27
  - 28
  - 29
  - 30
  - 31
  - 32
  - 33
  - 34
  - 35
  - 36
  - 37
  - 38
  - 39
  - 40
  - 41
  - 42
  - 43
  - 44
  - 45
  - 46
  - 47
  - 48
  - 49
  - 50
  - 51
  - 52
  - 53
  - 54
  - 55
  - 56
  - 57
  - 58
  - 59
  - 60
20. Hirsh J, Guyatt G, Albers GW, et al. Antithrombotic and thrombolytic therapy: American College of Chest Physicians Evidence-Based Clinical Practice Guidelines (8th Edition). *Chest* 2008;**133**(6 Suppl):110S-12S.
21. Blattler W. Aspects of cost effectiveness in therapy of acute leg/pelvic vein thrombosis. *Wien Med Wochenschr* 1999;**149**(2-4):61-5.
22. Gelderblom GJ, Hagedoorn-Meuwissen EAV. Kousen uittrekhulpmiddel Easy-Lever. Een onderzoek naar bruikbaarheid, effecten en belemmeringen, in opdracht van ZonMw. 2005(juni).
23. Raju S, Hollis K, Neglen P. Use of compression stockings in chronic venous disease: patient compliance and efficacy. *Ann Vasc Surg* 2007;**21**(6):790-5.
24. Villalta S, Bagatella P, Picolli A, et al. Assessment of validity and reproducibility of a clinical scale for the post thrombotic syndrome. *Haemostasis* 1994(24):158a.
25. Kahn SR, Partsch H, Vedantham S, et al. Definition of post-thrombotic syndrome of the leg for use in clinical investigations: a recommendation for standardization. *J Thromb Haemost* 2009;**7**(5):879-83.
26. Weinstein MC, O'Brien B, Hornberger J, et al. Principles of good practice for decision analytic modeling in health-care evaluation: report of the ISPOR Task Force on Good Research Practices--Modeling Studies. *Value Health* 2003;**6**(1):9-17.
27. Ten Cate-Hoek AJ, Toll DB, Buller HR, et al. Cost-effectiveness of ruling out deep venous thrombosis in primary care versus care as usual. *J Thromb Haemost* 2009;**7**(12):2042-9.
28. Brazier J, Roberts J, Deverill M. The estimation of a preference-based measure of health from the SF-36. *Journal of health economics* 2002;**21**(2):271-92.
29. Dolan P. Modeling valuations for EuroQol health states. *Medical care* 1997;**35**(11):1095-108.
30. Blackwelder WC. "Proving the null hypothesis" in clinical trials. *Control Clin Trials* 1982;**3**(4):345-53.
31. Laster LL, Johnson MF. Non-inferiority trials: the 'at least as good as' criterion. *Stat Med* 2003;**22**(2):187-200.

1  
2  
3  
4  
5  
6  
7 Study Protocol

8 The IDEAL DVT study, individualized duration elastic compression therapy against long-term duration  
9 of therapy for the prevention of post thrombotic syndrome, a randomized controlled trial  
10  
11  
12  
13

14  
15  
16  
17  
18 Authors: Arina J ten Cate-Hoek<sup>1,2</sup>, Annemieke C Bouman<sup>1,2</sup>, Manuela Joore<sup>3</sup>, Martin Prins<sup>3,4</sup>, Hugo  
19 ten Cate<sup>1,2</sup>, for the IDEAL DVT trial investigators.  
20  
21

22 Corresponding author: Arina J ten Cate-Hoek MD, PhD.

23 Address: P Debyelaan 25

24 6229 HX Maastricht

25  
26  
27 E-mail: [arina.tencate@maastrichtuniversity.nl](mailto:arina.tencate@maastrichtuniversity.nl)

28 Telephone number: 0031(0)43-3871243

29 Fax number: 0031(0)43-3876096  
30  
31  
32

33  
34 <sup>1</sup>Laboratory for Thrombosis and Hemostasis, Maastricht University Medical Centre, Maastricht, the  
35 Netherlands  
36

37 <sup>2</sup>Department of Internal Medicine, Maastricht University Medical Centre, Maastricht, the Netherlands

38  
39 <sup>3</sup>Department of Clinical Epidemiology and Medical Technology Assessment (KEMTA), Maastricht  
40 University Medical Center, Maastricht, The Netherlands  
41

42 <sup>4</sup>Department of Epidemiology, Care and Public Health Research Institutes, Maastricht University,  
43 Maastricht, the Netherlands  
44  
45

46  
47 Key words: Post thrombotic syndrome, deep vein thrombosis, elastic compression stocking therapy,  
48 protocol, RCT  
49

50 Word count: 3345  
51  
52  
53  
54  
55  
56  
57  
58  
59  
60

**Abstract****Introduction:**

Post thrombotic syndrome (PTS) is a serious complication of deep vein thrombosis (DVT) of the leg that affects 20-50% of patients. Once a patient experiences PTS there is no treatment that effectively reduces the debilitating complaints. Two randomized controlled trials showed that elastic compression stocking (ECS) therapy after DVT for 24 months can reduce the incidence of PTS by 50%. However, it is unclear whether all patients benefit to the same extent from ECS therapy or what the optimal duration of therapy for individual patients should be. ECS therapy is costly, inconvenient, demanding and sometimes even debilitating. Tailoring therapy to individual needs could save substantial costs. The objective of the IDEAL DVT study therefore is to evaluate whether tailoring the duration of ECS therapy on signs and symptoms of the individual patient is a safe and effective method to prevent PTS, compared to standard ECS therapy.

**Methods and analysis:**

A multicentre, single-blinded, allocation concealed, randomized, non-inferiority trial. A total of 864 consecutive patients with acute objectively documented proximal DVT of the leg are randomized to either standard duration of 24 months or tailored duration of ECS therapy following an initial therapeutic period of 6 months. Signs and symptoms of PTS are recorded at regular clinic visits. Furthermore, quality of life, costs, patient preferences and compliance are measured. The primary outcome is the proportion of patients with PTS at 24 months.

**Ethics and dissemination:**

Based on current knowledge the standard application of ECS therapy is questioned. The IDEAL DVT study will address the central questions that remain unanswered: What individual patients do benefit from ECS therapy and what is the optimal individual treatment duration? Primary ethics approval was received from the Maastricht University Medical Centre.

Results of the study will be disseminated via peer-reviewed publications and presentations at scientific conferences.

**Trial Registration number:**

NCT01429714 and NTR 2597

## Background

After deep vein thrombosis (DVT) 20-50% of patients develop post thrombotic syndrome (PTS). PTS is a chronic condition, characterized by leg complaints such as pain; heaviness; cramps; aching; tingling; and leg signs due to venous insufficiency, evolving in severe cases to venous ulceration of the leg that was affected by the DVT.<sup>1-5</sup> PTS is a serious affliction, with substantial impact on quality of life and costs.<sup>2,6</sup> Because an effective therapy is lacking, prevention of PTS is of major importance.

Up till now, elastic compression stocking (ECS) therapy after DVT has been the mainstay of PTS prevention. The evidence sustaining the value of ECS therapy following acute DVT is derived from 2 randomized clinical trials, which showed that incidences of PTS were reduced by approximately 50%, with application of ECS therapy for 24 months.<sup>7,8</sup> However, based on these trials it is still undecided whether all patients benefit to the same extent from ECS therapy or what the optimal duration of ECS therapy for individual patients should be. We have previously assessed the safety of shortened duration of ECS therapy based on individual patient clinical scores in a management study of 125 patients, and we have shown that tailoring the duration of ECS therapy based on the signs and symptoms of the individual patient after an initial treatment period of 6 months, is a safe strategy to prevent PTS. We found that 50% of our patients did not need ECS therapy for as long as 2 years, while the overall incidence of PTS was 21.1% (95% CI 13.5- 28.7).<sup>9</sup> This incidence is comparable to published incidences after 24 months ECS therapy.<sup>7,8</sup> While this was a prospective management cohort study with an open character and therefore prone to bias, the results of this study need to be confirmed by an adequately powered randomized controlled trial.

There have been other studies that highlighted different aspects of ECS therapy. ECS therapy may not be indicated for all patients as shown by a study that assessed whether ECS therapy initiated one year after the event of DVT would lower the incidence of PTS in patients without complaints but with reflux on duplex testing. No significant benefit of ECS therapy at this late time of onset was found. The incidence of PTS was low in both groups.<sup>10</sup> One study so far assessed whether prolonged duration of ECS therapy was superior to 6 months of ECS therapy following an event of proximal DVT. In this study no significant difference in the incidence of PTS according to the CEAP classification was observed between the two treatment groups.<sup>11</sup>

1  
2  
3  
4  
5  
6  
7 The proposed IDEAL (individually tailored elastic compression against (=versus) longterm therapy)  
8 DVT study is a non-inferiority trial and aims to demonstrate that the assessed alternative therapy  
9 based on ECS for 6 months followed by individually prolonged ECS therapy based on Villalta scores is  
10 non-inferior to the comparator ECS therapy for a standard duration of 24 months. In addition we are  
11 interested to study the cost-effectiveness of individual tailoring of the duration of ECS therapy via a  
12 cost-utility analysis (CUA) and we want to retrieve information on the patient's motivations for  
13 compliance or non-compliance to therapy. Because compliance to therapy is one of the most  
14 important prerequisites for successful ECS therapy, a discrete choice experiment (DCE) will be  
15 performed in which patient preferences towards ECS therapy will be assessed, in order to reveal the  
16 main obstacles for compliance to therapy. For this purpose, a DCE questionnaire will be send to a  
17 subset of the population (300 patients) at approximately 3 months after DVT.

18  
19  
20  
21  
22  
23  
24 The results of a recently published placebo controlled trial performed by Kahn et al. refuted the routine  
25 wearing of ECS after DVT altogether.<sup>12</sup> This study showed no treatment effect at all from ECS therapy  
26 in contrast to the large treatment effects found in previous non-placebo controlled trials.<sup>7 8</sup> The  
27 unexpected lack of effectiveness cannot be dismissed solely as a placebo effect. The compliance to  
28 ECS therapy, a major determinant of effectiveness, was 55.6% after 24 months. This was less in  
29 comparison to the previous trials by Brandjes and Prandoni, where compliance was up to 90%.<sup>7 8 12</sup>  
30 Although a per protocol analysis of the patients reporting regular stocking use yielded the same  
31 outcome, this sub analysis may not be adequately powered to dismiss lack of compliance as an  
32 important determinant of non-effectiveness.

33  
34  
35  
36  
37  
38 Based on current knowledge it is therefore understood that the standard application of ECS therapy is  
39 questioned. Especially the benefit to individual patients and the optimal duration of ECS therapy were  
40 never studied properly and as a result it is unclear which individual patients require therapy and for  
41 how long.

42  
43  
44  
45 The IDEAL DVT study aims to address these topics. In addition quality of life, patient preference  
46 towards ECS therapy, compliance to therapy, as well as cost-effectiveness of ECS therapy will be  
47 assessed.

48  
49  
50 The primary outcome of the IDEAL DVT study will be PTS at 24 months after the event. The  
51 secondary outcomes will be: 1. Health Related Quality Of Life, measured by questionnaires (SF-36<sup>13</sup>,  
52 EuroQOL-5D<sup>14</sup>, Dutch translated Veines-Qol<sup>15</sup>, 2. Costs<sup>16</sup>), 3. Recurrent thrombosis, according to  
53  
54  
55  
56  
57  
58  
59  
60

1  
2  
3  
4  
5  
6  
7 criteria as published<sup>17</sup> and assessed by objective tests, 4. VTE related death during follow-up,  
8 assessed by an independent and blinded adjudication committee, 5. Patient preferences, assessed  
9 with a Discrete Choice Experiment (DCE)<sup>18</sup>.  
10

11  
12 The scope of the problem in the Netherlands

13  
14 In the Netherlands, each year around 25.000 patients experience a new event of DVT. In order to  
15 prevent PTS, common practice is to prescribe custom fitted ECS therapy for 2 years for all patients.<sup>19</sup>  
16  
17 <sup>20</sup> ECS therapy is costly, demanding and sometimes even debilitating. Elderly patients can often not  
18 apply the ECS by themselves but need help from family or they even need home care visits (7.5%).<sup>21-</sup>  
19  
20 <sup>23</sup> Total annual costs of ECS therapy roughly amounts to 2.5 million euro for stockings (25.000  
21 patients\*100 euro) and 21 million euro for home care (7.5%\*25.000 patients\*500 visits\*20 euro).<sup>21-23</sup>  
22  
23 Moreover, the majority of patients do not experience any post thrombotic complaints.<sup>10</sup> In the  
24 Netherlands, over 10 million euro each year could be saved if ECS treatment would be individualized.  
25  
26  
27  
28

### 29 **Methods/Design**

30  
31 A multicentre, single-blinded, allocation concealed, randomized, non-inferiority trial comparing  
32 individually tailored duration of ECS therapy (intervention) with standard duration of 24 months ECS  
33 therapy (control), for the prevention of PTS. Randomization will guarantee a balanced distribution of  
34 patients within each patient group. Stratification will be performed on centre and potentially  
35 confounding effects such as age, sex and body mass index. The study will be a multicenter study in  
36 order to get a good representation of patients and to achieve sufficient patient numbers. The primary  
37 outcome will be PTS at 24 months after the event; the observers will be blinded to the allocated  
38 treatment arm. The allocation will be concealed from study personnel involved in assessing the leg  
39 symptoms and rating the PTS scores. Both randomization and allocation concealment are used as  
40 strategies against bias. The study is not double blinded; no inactive stockings will be used in the  
41 comparator group. The use of sham stockings will very likely interfere with the quality of life and will  
42 complicate the assessment of perceived differences between groups. Patients will be followed for the  
43 entire study duration; incidence of recurrent DVT and VTE related death during the follow-up period  
44 will be documented.  
45  
46  
47  
48  
49  
50  
51  
52  
53  
54  
55  
56  
57  
58  
59  
60

1  
2  
3  
4  
5  
6  
7 Patients and treatment

8 Consecutive, consenting adults with an acute objectively documented proximal DVT of the leg,  
9 adequately treated with anticoagulant treatment and initial compression therapy according to a  
10 prespecified protocol are included in the study. Patients are included and randomized in the IDEAL  
11 DVT study within 2-6 weeks after DVT.  
12

13 Exclusion criteria are:

- 14  
15
- 16 • Previous DVT in the affected leg. Patients with a previous ipsilateral DVT might already have  
17 developed PTS after the first DVT.
  - 18 • Recurrent DVT in the 6 months following inclusion, as it cannot be justified to advise these  
19 patients to discontinue ECS therapy 6 months after DVT.
  - 20 • Pre-existent venous insufficiency (skin signs C3-C6 on CEAP score or requiring ECS therapy).  
21 Pre-existent venous insufficiency increases the risk of developing PTS and the majority of  
22 patients with venous insufficiency already chronically wear elastic compression stockings. In  
23 addition venous insufficiency is closely related to PTS and is therefore difficult to differentiate  
24 from PTS.  
25
  - 26 • Contraindication for ECS therapy such as intermittent claudication or clinical signs of leg  
27 ischemia or asymptomatic arterial insufficiency (a pulse deficit or bruit at sites of narrowing at  
28 physical examination).  
29
  - 30 • Active thrombolysis, as thrombolysis reduces the risk of PTS.
  - 31 • Limited life expectancy (< 6 months), as the follow-up period is 2 years.
- 32  
33  
34  
35  
36  
37  
38

39 Patients are recruited from 12 hospitals in the Netherlands and 2 hospitals in Italy.

40 There is a prespecified protocol for the management of DVT in all participating centres.

41  
42 In the initial acute phase after DVT, until the acute oedema has disappeared, one of three strategies  
43 will be applied. The leg is either bandaged with short stretch bandages to a compression of 30-40  
44 mmHg, worn day and night and redressed twice per week; or a bandage stocking with 35mmHg  
45 compression is prescribed (Mediven Struva 35<sup>®</sup>, Medi, Breda, the Netherlands), worn day and night;  
46  
47 or no initial compression therapy is applied, according to the prespecified strategy of the hospital  
48 protocol. After the initial phase, a custom fitted, flat knitted, knee length graduated elastic compression  
49 stocking class III (ankle pressure 40 mmHg) is prescribed for all patients. The same brand and type  
50 (Mediven 550) of compression stocking is prescribed to all patients in all participating centres.  
51  
52  
53  
54  
55  
56  
57  
58  
59  
60

1  
2  
3  
4  
5  
6  
7  
8  
9  
10  
11  
12  
13  
14  
15  
16  
17  
18  
19  
20  
21  
22  
23  
24  
25  
26  
27  
28  
29  
30  
31  
32  
33  
34  
35  
36  
37  
38  
39  
40  
41  
42  
43  
44  
45  
46  
47  
48  
49  
50  
51  
52  
53  
54  
55  
56  
57  
58  
59  
60

Compression therapy with the elastic compression stocking is started immediately after the initial phase, so there is no period without compression in between, with exception of the patients who do not receive compression in the initial phase. Patients receive two new stockings every year. Patients are advised to wear the stockings during the daytime.

#### Procedures

After obtaining written informed consent, randomization is performed centrally at the coordinating study centre, the Maastricht University Medical centre. Patients are included and randomized within 2-6 weeks after diagnosis of DVT. Patients are randomized to one of the two treatment arms. (Figure 1)

A web-based randomisation program (TENALEA (Trans European Network for Clinical Trials Services)) is used that executes blocked randomisation with stratification on centre-level and on possible confounding patient characteristics such as age, sex, and Body Mass Index ( $<26 \text{ kg/m}^2$  -  $\geq 26 \text{ kg/m}^2$ ). Permuted blocks of randomly varying size are used to maintain balance of numbers in each treatment group and to ensure allocation concealment.

Information on allocation is only accessible to the study personnel at the coordinating study centre in Maastricht, and patients will receive information about their allocation via the coordinating study centre. The allocation will be concealed from study personnel involved in assessing the leg symptoms and rating the PTS scores. Patients are not blinded by the use of sham stockings, because they may influence quality of life, complicating the assessment of perceived differences between groups. Patients are asked not to reveal their treatment allocation to their own physician, and not to wear the elastic compression stocking at the day of their outpatient clinic visits.

All patients are advised to wear the elastic compression stocking during the first 6 months after DVT. In the control group, all patients are instructed to wear the elastic compression stocking daily for a total duration of 2 years. In the Intervention group, duration of ECS therapy is individually tailored based on Villalta scores.<sup>24</sup> After the first 6 months therefore, there are three scenarios:

- (1) The Villalta score at both the 3 and 6-month follow-up visit is  $\leq 4$ . Then the patient is advised to discontinue ECS therapy.
- (2) The Villalta score at the 3-month follow-up visit is  $\geq 5$  the Villalta score at the 6 month follow-up visit is  $\leq 4$ . The patient is advised to continue the ECS therapy for another 6 months. If the



1  
2  
3  
4  
5  
6  
7 Villalta score at the 12 month follow-up visit is  $\leq 4$ , the patient is allowed to discontinue the  
8 ECS therapy.

9  
10 (3) The Villalta score is  $\geq 5$  at both the 3 and 6 months follow-up visit. The patient is advised to  
11 continue the ECS therapy for a total duration of 24 months. (Figure 2)  
12  
13

14  
15 Using this algorithm the duration of ECS therapy is individually tailored in each patient. The decision  
16 on the duration of ECS therapy in patients in the intervention group is made centrally at the  
17 coordinating study centre, as only there the information on treatment allocation is available. The  
18 patient is informed about the decisions on the (dis) continuation of the ECS therapy by the  
19 coordinating centre.  
20  
21

22 When a patient develops symptoms and signs of PTS after discontinuation of ECS therapy, a  
23 predefined protocol is followed. If necessary, ECS treatment will be reinstated.  
24  
25  
26

#### 27 Follow-up

28  
29 All patients are followed for 24 months after DVT. During these 24 months they visit the outpatient  
30 clinic 4 times: at 3, 6, 12, and 24 months after the DVT. At each follow-up visit the signs of PTS will be  
31 recorded and scored, by the study nurse or the treating physician, using the objective part of the  
32 Villalta clinical scale for PTS.<sup>24</sup> In case of intermittent leg complaints or signs or symptoms suspect of  
33 recurrent VTE, patients are instructed to visit their treating physician. Study documentation will be  
34 filled out and adverse events will be recorded. The CCMO (central committee human related research)  
35 will be notified in case of serious adverse events or death.  
36  
37  
38  
39  
40

41 The patient is asked to fill out 5 questionnaires: at baseline, and 3, 6, 12 and 24 months later. All  
42 questionnaires will be offered as a web based application, each patient will have a unique personal  
43 entry code. For patients who are not able or willing to use the electronic questionnaires, a paper  
44 version will be available. The first questionnaire is filled out shortly after inclusion (4-6 weeks after  
45 DVT) and the subsequent questionnaires are filled out the day before each follow-up visit. All  
46 questionnaires contain the subjective part of the Villalta clinical scale for PTS<sup>24</sup>, questions on ECS  
47 compliance, a cost questionnaire<sup>16</sup>, and three health related quality of life (HRQOL) questionnaires:  
48 the Dutch translated Veines-Qol<sup>15</sup>, the SF-36<sup>13</sup>, and the EuroQOL-5D<sup>14</sup>. In a subset of the study  
49 population patient preferences regarding elastic compression therapy will be analysed, by conducting  
50  
51  
52  
53  
54  
55  
56  
57  
58  
59  
60

1  
2  
3  
4  
5  
6  
7 a discrete choice experiment (DCE). For this purpose, a DCE questionnaire will be sent to a subset of  
8 the population at approximately 3 months after DVT.  
9

10 Compliance to ECS therapy is monitored in two ways. Each questionnaire contains a question on  
11 compliance to the advised version of ECS therapy. Because compliance and adherence to therapy is  
12 of crucial importance the number of contact moments for the assessment of compliance with ECS  
13 therapy will be increased by adding telephone contacts to the regular clinical visits. Study-supporting  
14 staff will make computer-assisted random telephone calls during the entire follow-up period to both the  
15 patients in the group with the 2-year ECS intervention and to patients in the group with individualized  
16 ECS therapy. The telephone calls will be made randomly to create a surprise effect (patients are off  
17 guard) and to allow for a distribution of contacts over the entire study period. Per patient 3 extra  
18 contact moments will be created. A standard questionnaire will be used to assess compliance and to  
19 address reasons for non-compliance. Crossover to another therapy arm will be discussed and  
20 discouraged.  
21  
22  
23  
24  
25  
26  
27  
28  
29

### 30 Outcomes

31 The primary outcome is the proportion of patients with PTS at the end of follow-up, 24 months after  
32 DVT. PTS is defined as a Villalta score of  $\geq 5$  at two consecutive visits that are at least three months  
33 apart. The time point of the second Villalta score of  $\geq 5$  will be considered the time point of PTS  
34 diagnosis. Although the consensus is to diagnose PTS at the 6-month visit or later based on one  
35 single Villalta score  $\geq 5$ <sup>25</sup>, we modelled this study after the preceding management study in which two  
36 consecutive Villalta scores  $\geq 5$  were needed for the diagnosis PTS. We observed that a proportion of  
37 patients (about 12%) had fluctuating Villalta scores beyond 6 months after the acute event of DVT.<sup>9</sup>  
38 Assigning the diagnosis based on one single score  $\geq 5$  would therefore lead to misclassification and  
39 overestimation of the PTS incidence. The Villalta scores at 6 months will be available; therefore also  
40 the proportion of patients with PTS according to the consensus scoring method will be presented.  
41  
42  
43  
44  
45  
46  
47  
48

49 Secondary outcomes include:

- 50 1. HRQOL, measured by questionnaires (SF-36<sup>13</sup>, EuroQOL-5D<sup>14</sup>, Dutch translated Veines-QoL<sup>15</sup>), 2.
- 51 Costs<sup>16</sup>, 3. Recurrent thrombosis, according to criteria as published<sup>17</sup> and assessed by objective
- 52
- 53
- 54
- 55
- 56
- 57
- 58
- 59
- 60

1  
2  
3  
4  
5  
6  
7 tests, 4. VTE related death during follow-up, assessed by an independent and blinded adjudication  
8 committee, 5. Patient preferences, assessed with a Discrete Choice Experiment (DCE)<sup>18</sup>.  
9

10  
11 Since both effects on costs and generic health-related quality of life are to be expected, the method of  
12 economic evaluation is a cost-utility analysis (CUA). The analysis will be from a societal perspective.  
13 The primary effect parameter is generic health-related quality of life, measured in quality adjusted life  
14 years (QALYs). We will perform two analyses: a trial based CUA with a time horizon of two years  
15 (identical to the duration of follow up in the clinical study), and a model-based CUA with a lifelong time  
16 horizon. For the latter, we will follow the guidelines of good modelling.<sup>26</sup> We will be able to adapt a  
17 Markov model for diagnostic strategies in DVT, which was developed by our group earlier.<sup>27</sup> Costs in  
18 the economic analyses include direct health care costs (medical costs for prevention, diagnostics,  
19 therapy, rehabilitation and care), direct non-health care costs (travel costs) and indirect costs  
20 (productivity loss). Utilities will be calculated from the responses on the EQ-5D and SF36 classification  
21 systems using the available multi-attribute utility functions.<sup>28 29</sup> Incremental cost-utility ratios will be  
22 calculated, and non-parametric bootstrap analyses will be used to quantify the uncertainty surrounding  
23 the cost-utility ratio of the trial-based analysis. Sensitivity analyses and subgroup analyses will be  
24 performed, to assess the impact of variation in parameters and heterogeneity of the patient population.  
25 ECS therapy has several disadvantages for the patients (stockings are uncomfortable, ugly, and  
26 difficult to put on and off), while duration and effectiveness are uncertain. A DCE will be conducted to  
27 assess the patient preferences regarding ECS therapy, providing insight in the trade-offs patients  
28 make between characteristics of the therapy when deciding to wear the stocking or not. Duration of  
29 ECS therapy is one of the characteristics. Data will be analysed using multinomial logit models and  
30 mixed logit models. (Nlogit, Econometric Software)  
31  
32  
33  
34  
35  
36  
37  
38  
39  
40  
41  
42  
43  
44

#### 45 Sample size calculation

46 The proposed study is a non-inferiority trial and aims to demonstrate that the assessed alternative  
47 therapy based on ECS for 6 months followed by individually prolonged ECS therapy based on Villalta  
48 scores is not worse than the comparator ECS therapy for a standard duration of 24 months, by more  
49 than the prespecified amount of 7.5% (the non-inferiority margin). The published incidence of PTS  
50 following two years of ECS lies between 20 and 30%. (Prandoni 24.5% (95% CI 15.6- 33.4), Brandjes  
51  
52  
53  
54  
55  
56  
57  
58  
59  
60

1  
2  
3  
4  
5  
6  
7 20% (95% CI 12.4-29.2)<sup>7 8</sup> As it is statistically impossible to demonstrate equivalence (prove the H0 of  
8 no difference), Blackwelder proposed a one sided significance test to reject the null hypothesis by a  
9 clinically acceptable amount.<sup>30</sup> If we allow a difference of 7.5% in the outcome PTS between the group  
10 with ECS for 2 years and the group with the alternative therapy, 70% of the effect will be preserved.  
11 This proportion of loss in efficacy is customarily accepted in controlled randomized clinical trials. At a  
12 one sided significance level of 0.05 and a power of 80%, with a ratio of 1, a total of 847 patients is  
13 needed to provide sufficient patients for an adequately powered trial.<sup>30 31</sup> Loss to follow-up of patients  
14 is expected to be less than 2% since the intervention does not have an invasive nature. Therefore, a  
15 total of 864 patients are needed (432 patients per treatment arm).  
16  
17  
18  
19  
20  
21

#### 22 Statistical analysis

23 Descriptive statistics of the total population and of the two treatment groups separately will be  
24 computed to provide baseline characteristics of the patients in both treatment arms.  
25

26 For the primary outcome PTS, univariate analysis of all proportions will be performed with logistic  
27 regression (chi-squared) analysis. Kaplan-Meier method will be used to calculate the cumulative  
28 incidences of PTS, adjusted for centre, to compare incidence rates between the two treatment arms.  
29 Patients who die or are lost to follow-up will be censored at their last visit. ANOVA will be applied to  
30 assess changes over time, by comparing different outcome measures at the different time points of  
31 follow-up.  
32

33 Hazard ratio's and 95% confidence intervals for both treatment arms will be calculated using Cox  
34 regression models. Hazard ratio's will be stratified for centre and adjusted for age, sex, BMI, clinical  
35 presentation of DVT, and extent of the index deep vein thrombosis.  
36  
37

#### 38 Interim analysis (safety)

39 A prespecified safety analysis will be performed when 50% of the subjects have completed the 2-year  
40 follow-up. The analysis will be performed by the coordinating centre, and supervised by the principal  
41 investigators. The safety analysis will be performed to assess significant enhanced risk of PTS or  
42 excess morbidity/mortality in the intervention arm of the study population. Fisher's exact test will be  
43 performed to compare incidence of PTS at a significance level of 0.05 (two sided). The study can  
44 be stopped in case of significant excess morbidity/mortality in the alternative treatment arm.  
45  
46  
47  
48  
49  
50  
51  
52  
53  
54  
55  
56  
57  
58  
59  
60

### Ethical considerations

The medical ethical committees of all participating hospitals in the Netherlands and Italy approved this study. All patients are extensively informed about the study, and written informed consent is obtained from all participating patients.

The IDEAL DVT study started including patients at 11<sup>th</sup> of March 2011 and inclusion is currently on-going. Recruitment is expected to be terminated in January 2015. As the follow-up is 2 years, the results are expected within 3 years, in January 2017.

Formatted: Superscript

### Discussion

Based on current knowledge the standard application of ECS therapy after DVT is questioned. The definitive answer on the usefulness of ECS therapy for the prevention of PTS is not yet provided. Therefore the need for the IDEAL DVT study remains unchanged. The benefit to individual patients and the optimal duration of ECS therapy were never studied properly and as a result it is unclear which individual patients require therapy and for how long. The IDEAL DVT study will address the central questions that remain unanswered: What individual patients do benefit from ECS therapy and what is the optimal individual treatment duration? The study that we plan to perform is not only innovative; for the first time individual tailoring of duration of ECS therapy will be investigated, but also it will provide unique additional knowledge on the safety, effectiveness and cost-effectiveness of this approach. ~~The IDEAL DVT study started including patients March 2011 and is currently on-going. Recruitment is expected to be terminated within 1 year. As the follow-up is 2 years, the results are expected within 3 years.~~

**Trial status**

The IDEAL DVT study is currently in progress. Patient recruitment started March 15th 2011 and is still on-going.

**Acknowledgments**

The IDEAL DVT trial is funded by a grant from Zon-mW the Netherlands. ( 171102007)  
We especially acknowledge the participating investigators.

**Competing interests**

The authors declare that they have no competing interests.

**Funding**

This work was supported by Zon-mW the Netherlands grant number 171102007.

**Contributions**

AtC wrote the protocol and designed the study, the other authors MJ (cost-effectiveness research), MP (study design/statistics) and HtC (study design) contributed. AB is a PhD student and coordinator of the trial.

**Ethics approval**

Maastricht University Medical Centre.

1  
2  
3  
4  
5  
6  
7 The IDEAL DVT investigators:

8 The Netherlands:

9  
10 *Maastricht, Maastricht University Medical Centre*

11 Arina J ten Cate-Hoek MD, PhD (principal investigator)

12 Hugo ten Cate MD, PhD

13 Manuela Joore PhD

14 Annemieke C Bouman MD

15  
16  
17 *Groningen, University Medical Centre Groningen*

18 Karina Meijer MD PhD

19  
20  
21 *Amsterdam, Academic Medical Centre*

22 Saskia Middeldorp MD, PhD

23 Michiel Coppens MD, PhD

24 Mandy N Lauw MD

25 Y Whitney Cheung MD

26  
27  
28 *Heerlen, Atrium Medical Centre*

29 Guy JM Mostard MD

30 Asiong Jie MD PhD

31  
32  
33 *Hoorn, Westfriesgasthuis*

34 Simone M van den Heiligenberg MD

35  
36  
37 *Eindhoven, Maxima Medical Centre*

38 Lidwine W Tick MD, PhD

39 Marten R Nijziel MD, PhD

40  
41  
42 *Almere, Flevohospital*

43 Marije ten Wolde MD, PhD

44 Y Whitney Cheung MD

45  
46  
47 *Amsterdam, OLVG*

48 Sanne van Wissen MD, PhD

49 Wim E Terpstra MD, PhD

50  
51  
52 *Roermond, Laurentius hospital*

53 Marlène HW van de Poel MD

54

55

56

57

58

59

60

1  
2  
3  
4  
5  
6  
7 *Amsterdam, Slotervaart hospital*

8 Hans-Martin Otten MD, PhD

9  
10 *Amsterdam, VU Medical Centre*

11 Erik H Serné MD, PhD

12  
13 *Nijmegen, Radboud University Nijmegen Medical Centre*

14 Edith H Klappe MD, PhD

15 Mirian CH Janssen MD, PhD

16 Tjerk de Nijs MD

17  
18  
19 Italy:

20  
21 *Padua, Aziende Ospedaliere di Padova*

22 Paolo Prandoni MD, PhD

23  
24 *Treviso, Aziende ULSS*

25 Sabina Villalta MD  
26  
27  
28  
29  
30  
31  
32  
33  
34  
35  
36  
37  
38  
39  
40  
41  
42  
43  
44  
45  
46  
47  
48  
49  
50  
51  
52  
53  
54  
55  
56  
57  
58  
59  
60



## References

1. [www.rijksoverheid.nl](http://www.rijksoverheid.nl). Secondary [www.rijksoverheid.nl](http://www.rijksoverheid.nl).
2. Kahn SR, Shrier I, Julian JA, et al. Determinants and time course of the postthrombotic syndrome after acute deep venous thrombosis. *Ann Intern Med* 2008;**149**(10):698-707.
3. Pesavento R, Villalta S, Prandoni P. The postthrombotic syndrome. *Intern Emerg Med* 2010;**5**(3):185-92.
4. Prandoni P, Kahn SR. Post-thrombotic syndrome: prevalence, prognostication and need for progress. *Br J Haematol* 2009;**145**(3):286-95.
5. Prandoni P, Villalta S, Bagatella P, et al. The clinical course of deep-vein thrombosis. Prospective long-term follow-up of 528 symptomatic patients. *Haematologica* 1997;**82**(4):423-8.
6. Bergqvist D, Jendteg S, Johansen L, et al. Cost of long-term complications of deep venous thrombosis of the lower extremities: an analysis of a defined patient population in Sweden. *Ann Intern Med* 1997;**126**(6):454-7.
7. Brandjes DP, Buller HR, Heijboer H, et al. Randomised trial of effect of compression stockings in patients with symptomatic proximal-vein thrombosis. *Lancet* 1997;**349**(9054):759-62.
8. Prandoni P, Lensing AW, Prins MH, et al. Below-knee elastic compression stockings to prevent the post-thrombotic syndrome: a randomized, controlled trial. *Ann Intern Med* 2004;**141**(4):249-56.
9. Ten Cate-Hoek AJ, Ten Cate H, Tordoir J, et al. Individually tailored duration of elastic compression therapy in relation to incidence of the postthrombotic syndrome. *J Vasc Surg* 2010;**52**(1):132-8.
10. Ginsberg JS, Hirsh J, Julian J, et al. Prevention and treatment of postphlebotic syndrome: results of a 3-part study. *Arch Intern Med* 2001;**161**(17):2105-9.
11. Aschwanden M, Jeanneret C, Koller MT, et al. Effect of prolonged treatment with compression stockings to prevent post-thrombotic sequelae: a randomized controlled trial. *J Vasc Surg* 2008;**47**(5):1015-21.
12. Kahn SR, Shapiro S, Wells PS, et al. Compression stockings to prevent post-thrombotic syndrome: a randomised placebo-controlled trial. *Lancet* 2014;**383**(9920):880-8.
13. Aaronson NK, Muller M, Cohen PD, et al. Translation, validation, and norming of the Dutch language version of the SF-36 Health Survey in community and chronic disease populations. *J Clin Epidemiol* 1998;**51**(11):1055-68.
14. Brooks R. EuroQol: the current state of play. *Health Policy* 1996;**37**(1):53-72.
15. Kahn SR, Lamping DL, Ducruet T, et al. VEINES-QOL/Sym questionnaire was a reliable and valid disease-specific quality of life measure for deep venous thrombosis. *J Clin Epidemiol* 2006;**59**(10):1049-56.
16. Brouwer W. Handleiding voor het gebruik van PRODISQ versie 2.1 (PROductivity and DISease Questionnaire). Een modulaire vragenlijst over de relatie tussen ziekte en productiviteitskosten. Toepasbaar bij economische evaluaties van gezondheidszorgprogramma's voor patiënten en werknemers. Rotterdam/Maastricht 2004
17. Prandoni P, Lensing AW, Bernardi E, et al. The diagnostic value of compression ultrasonography in patients with suspected recurrent deep vein thrombosis. *Thromb Haemost* 2002;**88**(3):402-6.
18. Lancaster K. A new approach to consumer theory. *J Polit Econ* 1966(74):132-57.
19. CBO. *CBO Richtlijn Diagnostiek, preventie en behandeling van veneuze trombo-embolie en secundaire preventie van arteriele trombose*. Utrecht: Kwaliteitsinstituut voor de Gezondheidszorg CBO, 2008.

20. Hirsh J, Guyatt G, Albers GW, et al. Antithrombotic and thrombolytic therapy: American College of Chest Physicians Evidence-Based Clinical Practice Guidelines (8th Edition). *Chest* 2008;**133**(6 Suppl):110S-12S.
21. Blattler W. Aspects of cost effectiveness in therapy of acute leg/pelvic vein thrombosis. *Wien Med Wochenschr* 1999;**149**(2-4):61-5.
22. Gelderblom GJ, Hagedoorn-Meuwisen EAV. Kousen uittrekhulpmiddel Easy-Lever. Een onderzoek naar bruikbaarheid, effecten en belemmeringen, in opdracht van ZonMw. 2005(juni).
23. Raju S, Hollis K, Neglen P. Use of compression stockings in chronic venous disease: patient compliance and efficacy. *Ann Vasc Surg* 2007;**21**(6):790-5.
24. Villalta S, Bagatella P, Picolli A, et al. Assessment of validity and reproducibility of a clinical scale for the post thrombotic syndrome. *Haemostasis* 1994(24):158a.
25. Kahn SR, Partsch H, Vedantham S, et al. Definition of post-thrombotic syndrome of the leg for use in clinical investigations: a recommendation for standardization. *J Thromb Haemost* 2009;**7**(5):879-83.
26. Weinstein MC, O'Brien B, Hornberger J, et al. Principles of good practice for decision analytic modeling in health-care evaluation: report of the ISPOR Task Force on Good Research Practices--Modeling Studies. *Value Health* 2003;**6**(1):9-17.
27. Ten Cate-Hoek AJ, Toll DB, Buller HR, et al. Cost-effectiveness of ruling out deep venous thrombosis in primary care versus care as usual. *J Thromb Haemost* 2009;**7**(12):2042-9.
28. Brazier J, Roberts J, Deverill M. The estimation of a preference-based measure of health from the SF-36. *Journal of health economics* 2002;**21**(2):271-92.
29. Dolan P. Modeling valuations for EuroQol health states. *Medical care* 1997;**35**(11):1095-108.
30. Blackwelder WC. "Proving the null hypothesis" in clinical trials. *Control Clin Trials* 1982;**3**(4):345-53.
31. Laster LL, Johnson MF. Non-inferiority trials: the 'at least as good as' criterion. *Stat Med* 2003;**22**(2):187-200.

1  
2  
3  
4  
5  
6  
7  
8  
9  
10  
11  
12  
13  
14  
15  
16  
17  
18  
19  
20  
21  
22  
23  
24  
25  
26  
27  
28  
29  
30  
31  
32  
33  
34  
35  
36  
37  
38  
39  
40  
41  
42  
43  
44  
45  
46  
47  
48  
49  
50  
51  
52  
53  
54  
55  
56  
57  
58  
59  
60

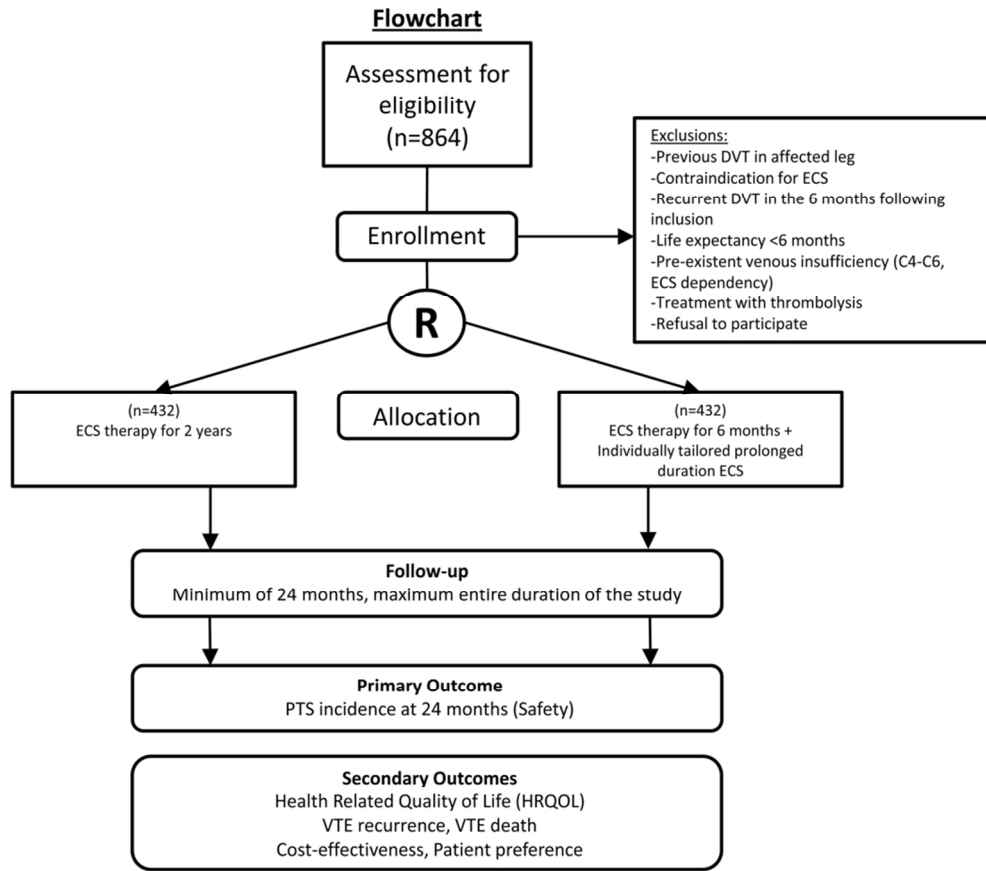

Figure 1. Study flow diagram  
90x79mm (300 x 300 DPI)

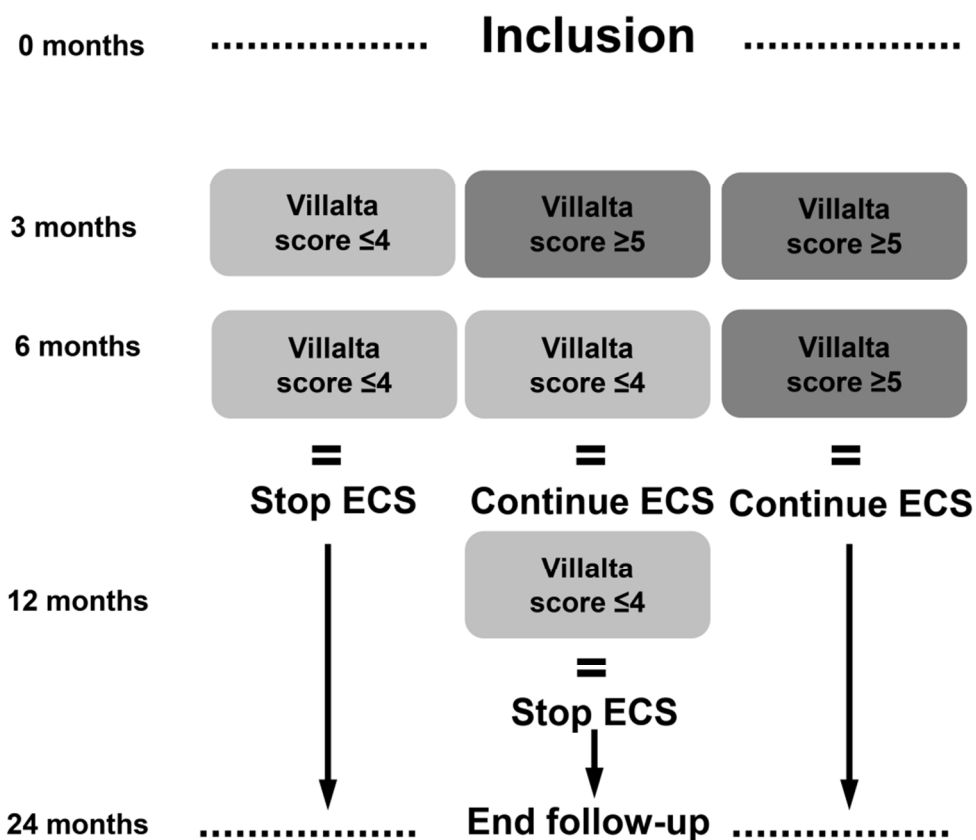

Figure 2. Algorithm individually tailored ECS therapy  
90x77mm (300 x 300 DPI)
